# Supplementary material for: Global concentrations of microplastics in soils – a review
Source: Copernicus journal article supplement (doi:10.5194/soil-6-649-2020), 2020-12-17
Supplement: Supplementary file 1 [file soil-6-649-2020-supplement.zip]

Archive with 2 entries (2 files):
- soil-6-649-2020-supplement-title-page.pdf
- Supplements (upload).ods
