# Supplementary material for: Global concentrations of microplastics in soils – a review
Source: Copernicus journal article supplement (doi:10.5194/soil-6-649-2020), 2020-12-17
Supplement: Supplementary file 1 [file soil-6-649-2020-supplement.zip › soil-6-649-2020-supplement-title-page.pdf]

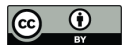

## *Supplement of*

# **Global concentrations of microplastics in soils – a review**

**Frederick Büks and Martin Kaupenjohann**

*Correspondence to:* Frederick Büks ([frederick.bueks@tu-berlin.de](mailto:frederick.bueks@tu-berlin.de))

- [soil-6-649-2020-supplement-title-page.pdf](#)
- [Supplements \(upload\).ods](#)

The copyright of individual parts of the supplement might differ from the CC BY 4.0 License.
