# Supplementary material for: Global concentrations of microplastics in soils – a review
Source: Copernicus journal article supplement (doi:10.5194/soil-6-649-2020), 2020-12-17
Supplement: Supplementary file 1 [file soil-6-649-2020-supplement.zip › Supplements (upload).ods]

## Sheet: concentrations in soils (condensed data)
		region	sites	land use	entry pathway	vicinity	sampling depth [cm]	method of extraction	method of quantification/ qualification	measured plastic type (bold=found)	mg kg-1 dw mv ± sd median (min–max)						items kg-1 dw mv ± sd median (min–max)						size span [µm]	shape	reference
		Wuhàn, 武汉市 (China)	8	hort	NA	municipal	NA	S-DF (ZnCl2 1.5 g cm-3)	LM, Raman	PA, PP > PS, PVC > PE	NA						1083 (600–3167)						20–5000 70% <200	fib,mb>frag	Chen et al. (2020)
			12	hort	road												1142 (300–12500)
		Región Metropolitana de Santiago (Chile)	1	agr	sew (1x)	municipal	0-25	S-DF (water, NaCl 1.2 g cm-3, Zn2Cl 1.55 g cm-3)	LM, shape-to-mass	NA	1.4 (0.7–2.2)						1200 (0–2200)						<5000 mainly <1000x50	fib>>others	Corradini et al. (2019)
			1	agr	sew (2x)						2.0 (1.8–3.2)						1800 (1200–3200)
			1	agr	sew (3x)						2.2 (0.6–4.6)						1200 (200–4400)
			1	agr	sew (4x)						2.9 (1.8–12.9)						2200 (800–12400)
			1	agr	sew (5x)						4.4 (1.8–10.3)						3600 (1000–10200)
		Southeast Ontario (Canada)	1	agr	no sew	rural	0-5, 5-10, 10-15	Fenton‘s reagent, DF	LM, FTIR	PS, PE, PP, PU, polyester, others	NA						4 ± NA						NA	fib>frag	Crossman et al. (2020)
		(Canada)	2	agr	sew (1x)	rural											103 ± 52
			1	agr	sew (2x)	rural											541 ± 305
		Köln (Germany)	1	NA	road	municipal	NA	PFE	Pyr-GC-MS	PE > PP, PS	915 ± 63						NA						NA	NA	Dierkes et al. (2019)
		Shǎnxī Province, 陕西省 (China)	9	agr	pm, sew	municipal	NA	S-DF (NaCl 1.2 g cm-3, CaCl2 1.5 g cm-3), H2O2	LM, FTIR	PE, PET, PP, PS, PVC	NA						2131 ± 371						<5000 mainly <500	fib>frag>other	Ding et al. (2020)
		Sydney (Australia)	1	NA	NA	industrial	NA	PFE	gravimetric, FTIR	PE, PS, PVC, PP, PET	2400 (300–67500)						NA						<1000	NA	Fuller and Gautam (2016)
		Tiānjīn, 天津市 (China)	1	NA	NA	municipal	NA	AM-DF (NaCl+NaI 1.5 g cm-3), H2O2	LM, FTIR	PP	NA						95						<3200	frag	Han et al. (2019)
		Shíhézǐ, 石河子市 (China)	1	agr	pm (5 yr)	municipal	0-40	S-DF (NaI 1.85 g cm-3), H2O2	LM, FTIR	PE	NA						80 ± 49						<5000	frag	Huang et al. (2020)
			1	agr	pm (15 yr)												308 ± 138
			1	agr	pm (24 yr)												1076 ± 347
		Yucatan Peninsula (Mexico)	10	hort	lit	rural	0-10, 10-20	U-DF (water)	LM	NA	NA						870 ± 1900						<2000 95% <50	NA	Huerta Lwanga et al. (2017)
		Shànghǎi, 上海市 (China)	20	hort	pg, pm	municipal	0-3, 3-6	U-DF (NaCl 1.2 g cm-3), H2O2	LM, FTIR	PP, PE > polyester	NA						70 ± 13						20–10000 54% <1000	fib>frag> films>pel	Liu et al. (2018)
		Malmö (Sweden)	1	agr	no sew	municipal	0-20	H2O2+enzymes, DF (ZnCl2 1.7 g cm-3)	LM, FTIR, shape-to-mass	diverse	0.3						NA						10–5000	NA	Ljung et al. (2018)
			1	agr	sew (1 t ha-1a-1)	municipal					0.3
			1	agr	sew (3 t ha-1a-1)	municipal					3.4
		Shànghǎi, 上海市 (China)	3	rice	ponding	municipal	0-10	S-DF (NaCl 1.24 g cm-3), H2O2	LM, FTIR	NA	NA						12 ± 4						>20	fib, frag	Lv et al. (2019)
			3	rice-fish													4 ± 2
		Austria/Southern Germany	11	NA	NA	municipal	NA	H2O2, U-DF (ZnCl2 1.45 g cm-3)	LM	NA	NA						11x106 (2x106–26x106)						5–1000	NA	Meixner et al. (2020)
		Mittelfranken (Germany)	1	agr	none	rural	0-5	H2O2, sieving	LM, FTIR	PE, PP, PS	NA						0.3 (0.0–1.3)						1000–5000	films>frag> others	Piehl et al. (2018)
		Fars province, فارس (Iran)	5	agr	pm	rural	0-10	S+U-DF (water)	LM, shape-to-mass	NA	1.2 ± 0.6						205 ± 186						40–740 mainly <100	NA	Razaei et al. (2019)
			5	gra	NA						0.2 ± 0.1						38 ± 17
		València (Spain)	1	agr	sew (1x)	rural	0-10, 10-30	S-DF (water, NaI 1.7 g cm-3)	LM, FTIR	NA	NA						1499 (999–1998)						>11	frag>>fib,films	van den Berg et al. (2020)
		(Spain)	1	agr	sew (3x)	rural											2664 (999–3996)
			1	agr	sew (3x)	NA											1998 (999–3663)
			1	agr	sew (3x)	rural											2830 (1998–3330)
			1	agr	sew (4x)	rural											5328 (1332–6327)
			1	agr	sew (4x)	NA											3330 (1998–3996)
			1	agr	sew (5x)	rural											7659 (7326–7992)
			1	agr	sew (5x)	NA											3330 (1998–5328)
			1	agr	sew (6x)	rural											2997 (2331–5994)
			1	agr	sew (8x)	rural											3996 (1998–8658)
			1	agr	sew (8x)	NA											2831 (1665–5994)
			1	agr	no sew	municipal											2498 (333–4662)
			1	agr	no sew	NA											999 (333–2331)
			1	agr	no sew	rural											500 (0–1332)
			1	orch	no sew	rural											999 (0–1332)
			1	orch	no sew	NA											2664 (999–2664)
		Denmark	1	agr	sew	NA	0-15	SDS, S-DF (water, ZnCl2 1.7 g cm-3)	LM, FTIR, shape-to-mass	PP > PE >> nylon	5.8 (0.0–16.5)						71000 (0–165000)						20–500	NA	Vollertsen (2017)
			1	agr	no sew					PE >> nylon > PP	12.0 (0.1–224)						145000 (53000–528000)
		Kūnmíng, 昆明市 (China)	2 (G)	agr	pg, sew, ww	municipal	0-5, 5-10	NaOH+H2O2, U-DF (water, NaI 1.8 g cm-3)	LM	NA	NA						26070 (13470–42960)						50–10000, 95% <1000, 82% <250	fib>>others	Zhang and Liu (2018)
			2 (N)	agr	pg, sew, ww												12050 (7100–26630)
			1 (G)	for	NA												14440 (8180–18100)
		Loess Plateau, 黃土高原 (China)	1	agr	pm	rural	0-10, 10-30	S+U-DF (water)	LM, shape-to-mass	LD-PE, PP	0.3 ± 0.5						80 ± 136						mainly >100	NA	Zhang et al. (2018)
			1	orch	NA						0.5 ± 0.7						187 ± 222
			1	hort	NA						0.1 ± 0.1						87 ± 213
		Hāěrbīn, 哈尔滨市 (China)	2	agr	pm	municipal	0-20 (0-30)	DF (water)	LM, FTIR, shape-to-mass	NA	0.1 ± 0.6						163 ± 250						50–5000 mainly >100	NA	Zhang et al. (2020)
			2	agr	pm	rural					0.0 ± 0.0						75 ± 130
		Wuhàn, 武汉市 (China)	10	hort	pm, sew, ww	mainly industrial	at 5	KOH+NaClO, S+U-DF (NaCl 1.19 g cm-3, Zn2Cl 1.55 g cm-3)	LM, Raman	PE > PA, PP, PS	NA						43000–620000						10–5000 82%<100	frag>>others	Zhou et al. (2019)
			7	for	pm, sew, ww												96000–690000
			7	fal	pm, sew, ww												22000–200000
		Hangzhou Bay, 杭州湾 (China)	60	agr	pm	municipal	0-10	DF (NaCl 1.2 g cm-3, NaI 1.6 g cm-3), H2O2	LM, FTIR	diverse	NA						310 (0–2760)						>60 mainly 500–3000	frag, fib>films	Zhou et al. (2020)
		Ithaca (USA)	1	orch	sew	municipal	0-10, 10-25, 25-50	S-DF (water)	LM	NA	NA						1250 ± 60						NA	fib	Zubris and Richards (2005)
		Cobleskill (USA)	3	NA	sew	municipal											1240 ± 87

## Sheet: concentrations in soils (full data)
		region	soil info	sites	land use	entry pathway	vicinity	sampling depth [cm]	method of extraction	method of quantification/qualification	measured plastic type (bold=found)	mg kg-1 dw mv ± sd median (min–max)						items kg-1 dw mv ± sd median (min–max)						mm2 kg-1 dw mv ± sd median (min–max)						size span [µm]	shape	reference	year	comment
		Wuhàn, 武汉市 (China)	NA	1	hort	NA	municipal	NA	S-DF (ZnCl2 1.5 g cm-3)	LM, Raman	PA, PP > PS, PVC > PE	NA						1083						NA						20–5000 70% <200	fib,mb>frag	Chen et al., 2020	2020	derived from diagram
				1	hort	NA												3167
				1	hort	NA												750
				1	hort	NA												1200
				1	hort	NA												1000
				1	hort	NA												2100
				1	hort	NA												1083
				1	hort	NA												600
				1	hort	road												625
				1	hort	road												4375
				1	hort	road												1083
				1	hort	road												12500
				1	hort	road												1300
				1	hort	road												1200
				1	hort	road												1875
				1	hort	road												300
				1	hort	road												400
				1	hort	road												4500
				1	hort	road												500
				1	hort	road												550
		Región Metropolitana de Santiago (Chile)	entic haploxeroll	1	agr	sew (1x)	municipal	0-25	S-DF (water, NaCl 1.2 g cm-3, Zn2Cl 1.55 g cm-3)	LM, shape-to-mass	NA	1.4	(	0.7	–	2.2	)	1200	(	0	–	2200	)	NA						<5000 mainly <1000x50	fib>>others	Corradini et al. (2019)	2019	based on raw data provided by the authors
				1	agr	sew (2x)						2.0	(	1.8	–	3.2	)	1800	(	1200	–	3200	)
				1	agr	sew (3x)						2.2	(	0.6	–	4.6	)	1200	(	200	–	4400	)
				1	agr	sew (4x)						2.9	(	1.8	–	12.9	)	2200	(	800	–	12400	)
				1	agr	sew (5x)						4.4	(	1.8	–	10.3	)	3600	(	1000	–	10200	)
		Southeast Ontario (Canada)	sandy loam	1	agr	no sew	rural	0-5, 5-10, 10-15	Fenton‘s reagent, DF	LM, FTIR	PS, PE, PP, PU, polyester, others	NA						4	±	NA				NA						NA	fib>frag	Crossman et al. (2020)	2020
				1	agr	sew (1x)												187	±	99
				1	agr	sew (1x)												18	±	4
				1	agr	sew (2x)												541	±	305
		Köln (Germany)	NA	1	NA	road	municipal	NA	PFE	Pyr-GC-MS	PE > PP, PS	915	±	63				NA						NA						NA	NA	Dierkes et al. (2019)	2019
		Shǎnxī Province, 陕西省 (China)	NA	1	agr	pm, sew	municipal	NA	S-DF (NaCl 1.2 g cm-3, CaCl2 1.5 g cm-3), H2O2	LM, FTIR	PE, PET, PP, PS, PVC	NA						3050	±	400				NA						<5000 mainly <500	fib>frag>other	Ding et al. (2020)	2020	data taken from figure 3, only from non-rice periods
				1	agr	pm, sew												1875	±	675											fib>frag>other
				1	agr	pm, sew												1600	±	850											fib,frag>other
				1	agr	pm, sew												1800	±	150											fib,frag>other
				1	agr	pm, sew												2250	±	350											fib>frag>other
				1	agr	pm, sew												1250	±	83											fib,films>other
				1	agr	pm, sew												3400	±	530											fib>other
				1	agr	pm, sew												2250	±	125											fib>other
				1	agr	pm, sew												1700	±	175											films>fib>other
		Sydney (Australia)	NA	1	NA	NA	industrial	NA	PFE	gravimetric, FTIR	PE, PS, PVC, PP, PET	2400	(	300	–	67500	)	NA						NA						<1000	NA	Fuller and Gautam (2016)	2016
		Tiānjīn, 天津市 (China)	NA	1	NA	NA	municipal	NA	AM-DF (NaCl+NaI 1.5 g cm-3), H2O2	LM, FTIR	PP	NA						95						NA						<3200	frag	Han et al. (2019)	2019
		Shíhézǐ, 石河子市 (China)	NA	1	agr	pm (5 yr)	municipal	0-40	S-DF (NaI 1.85 g cm-3), H2O2	LM, FTIR	PE	NA						80	±	49				NA						<5000	frag	Huang et al. (2020)	2020
				1	agr	pm (15 yr)												308	±	138
				1	agr	pm (24 yr)												1076	±	347
		Yucatan Peninsula (Mexico)	NA	10	hort	lit	rural	0-10, 10-20	U-DF (water)	LM	NA	NA						870	±	1900				NA						<2000 95% <50	NA	Huerta Lwanga et al. (2017)	2017
		Shànghǎi, 上海市 (China)	NA	20	hort	pg, pm	municipal	0-3, 3-6	U-DF (NaCl 1.2 g cm-3), H2O2	LM, FTIR	PP, PE > polyester	NA						70	±	13				NA						20–10000 54% <1000	fib>frag> films>pel	Liu et al. (2018)	2018	Weighted average for both sampling layers (top 6 cm).
		Malmö (Sweden)	NA	1	agr	no sew	municipal	0-20	H2O2+enzymes, DF (ZnCl2 1.7 g cm-3)	LM, FTIR, shape-to-mass	diverse	0.3						NA						NA						10–5000	NA	Ljung et al. (2018)	2018
				1	agr	sew (1 t ha-1a-1)	municipal					0.3
				1	agr	sew (3 t ha-1a-1)	municipal					3.4
		Shànghǎi, 上海市 (China)	NA	1	rice	ponding	municipal	0-10	S-DF (NaCl 1.24 g cm-3), H2O2	LM, FTIR	NA	NA						8	±	2				NA						>20	fib, frag	Lv et al. (2019)	2019	data taken from figure 5A, only from non-rice periods
				1	rice	ponding												10	±	5
				1	rice	ponding												18	±	6
				1	rice-fish	ponding												2	±	1
				1	rice-fish	ponding												3	±	3
				1	rice-fish	ponding												7	±	2
		Freising (Germany)	NA	1	NA	NA	municipal	NA	H2O2, U-DF (ZnCl2 1.45 g cm-3)	LM	NA	NA						7220000						NA						5–1000	NA	Meixner et al., 2020	2020	based on raw data provided by the authors
		Freising (Germany)		1	NA	NA												19000000
		Freising (Germany)		1	NA	NA												8100000
		Freising (Germany)		1	NA	NA												1990000
		Freising (Germany)		1	NA	NA												13800000
		Guntramsdorf (Austria)		1	NA	NA												11700000
		Oberwart (Austria)		1	NA	NA												5180000
		Oberwart (Austria)		1	NA	NA												11100000
		Oberwart (Austria)		1	NA	NA												3550000
		Oberwart (Austria)		1	NA	NA												14100000
		Tulln (Austria)		1	NA	NA												25600000
		Mittelfranken (Germany)	Entisols / Vertisols	1	agr	none	rural	0-5	H2O2, sieving	LM, FTIR	PE, PP, PS	NA						0.3	(	0.0	–	1.3	)	NA						1000–5000	films>frag> others	Piehl et al. (2018)	2018	Felder ohne Plastikmulch oder Sewage Sludge sind fast bei 0
		Fars province, فارس (Iran)	St2	1	agr	pm	rural	0-10	S+U-DF (water)	LM, shape-to-mass	NA	1.3	±	1.2				200	±	231				NA						40–740 mainly <100	NA	Razaei et al. (2019)	2019
			St2	1	agr	pm						1.5	±	0.9				267	±	240
			Lt2	1	agr	pm						0.0	±	0.0				0	±	0
			Lt2	1	agr	pm						0.4	±	0.2				156	±	153
			Lu	1	agr	pm						2.8	±	0.6				400	±	305
			Ss	1	gra	NA						0.7	±	0.3				89	±	38
			Lt2	1	gra	NA						0.2	±	0.1				100	±	47
			Lt2	1	gra	NA						0.0	±	0.0				0	±	0
			Lt2	1	gra	NA						0.0	±	0.0				0	±	0
			Lt2	1	gra	NA						0.0	±	0.0				0	±	0
		València (Spain)	NA	1	agr	sew (1x)	rural	0-10, 10-30	S-DF (water, NaI 1.7 g cm-3)	LM, FTIR	NA	NA						1499	(	999	–	1998	)	NA						>11	frag>>fib,films	van den Berg et al. (2020)	2020	based on raw data provided by the authors
		(Spain)		1	agr	sew (3x)	rural											2664	(	999	–	3996	)
				1	agr	sew (3x)	NA											1998	(	999	–	3663	)
				1	agr	sew (3x)	rural											2830	(	1998	–	3330	)
				1	agr	sew (4x)	rural											5328	(	1332	–	6327	)
				1	agr	sew (4x)	NA											3330	(	1998	–	3996	)
				1	agr	sew (5x)	rural											7659	(	7326	–	7992	)
				1	agr	sew (5x)	NA											3330	(	1998	–	5328	)
				1	agr	sew (6x)	rural											2997	(	2331	–	5994	)
				1	agr	sew (8x)	rural											3996	(	1998	–	8658	)
				1	agr	sew (8x)	NA											2831	(	1665	–	5994	)
				1	agr	no sew	municipal											2498	(	333	–	4662	)
				1	agr	no sew	NA											999	(	333	–	2331	)
				1	agr	no sew	rural											500	(	0	–	1332	)
				1	orch	no sew	rural											999	(	0	–	1332	)
				1	orch	no sew	NA											2664	(	999	–	2664	)
		Denmark	NA	1	agr	sew	NA	0-15	SDS, S-DF (water, ZnCl2 1.7 g cm-3)	LM, FTIR, shape-to-mass	PP > PE >> nylon	5.8	(	0.0	–	16.5	)	71000	(	0	–	165000	)	NA						20–500	NA	Vollertsen (2017)	2017
				1	agr	no sew					PE >> nylon > PP	12.0	(	0.1	–	224	)	145000	(	53000	–	528000	)
		Kūnmíng, 昆明市 (China)	Gleysol	2	agr	pg, sew, ww	municipal	0-5, 5-10	NaOH+H2O2, U-DF (water, NaI 1.8 g cm-3)	LM	NA	NA						26070	(	13470	–	42960	)	NA						50–10000, 95% <1000, 82% <250	fib>>others	Zhang and Liu (2018)	2018	Weighted average for the top 10 cm
			Nitisol	2	agr	pg, sew, ww												12050	(	7100	–	26630	)
			Gleysol	1	for	NA												14440	(	8180	–	18100	)
		Loess Plateau, 黃土高原 (China)	NA	1	agr	pm	rural	0-10, 10-30	S+U-DF (water)	LM, shape-to-mass	LD-PE, PP	0.3	±	0.5				80	±	136				NA						mainly >100	NA	Zhang et al. (2018)	2018	Weighted average for the top 30 cm
				1	orch	NA						0.5	±	0.7				187	±	222
				1	hort	NA						0.1	±	0.1				87	±	213
		Hāěrbīn, 哈尔滨市 (China)	Mollisol	2	agr	pm	municipal	0-20 (0-30)	DF (water)	LM, FTIR, shape-to-mass	NA	0.1	±	0.6				163	±	250				6.2	±	23.4				50–5000 mainly >100	NA	Zhang et al. (2020)	2020	Weighted average for the respective sampling depth
				2	agr	pm	rural					0.0	±	0.0				75	±	130				1.7	±	2.9
		Wuhàn, 武汉市 (China)	NA	10	hort	pm, sew, ww	mainly industrial	at 5	KOH+NaClO, S+U-DF (NaCl 1.19 g cm-3, Zn2Cl 1.55 g cm-3)	LM, Raman	PE > PA, PP, PS	NA								43000	–	620000		NA						10–5000 82%<100	frag>>others	Zhou et al. (2019)	2019
				7	for	pm, sew, ww														96000	–	690000
				7	fal	pm, sew, ww														22000	–	200000
		Hangzhou Bay, 杭州湾 (China)	NA	60	agr	pm	municipal	0-10	DF (NaCl 1.2 g cm-3, NaI 1.6 g cm-3), H2O2	LM, FTIR	diverse	NA						310	(	0	–	2760	)	NA						>60 mainly 500–3000	frag, fib>films	Zhou et al. (2020)	2020
		Ithaca (USA)	fine-loamy	1	orch	sew	municipal	0-10, 10-25, 25-50	S-DF (water)	LM	NA	NA						1250	±	60				NA						NA	fib	Zubris and Richards (2005)	2005	Weighted average for the top 25 cm, data taken from Fig. 6
		Cobleskill (USA)	fine-loamy	1	NA	sew												2060	±	0
			coarse-loamy	1	NA	sew												440	±	70
			coarse-loamy	1	NA	sew												1220	±	190

## Sheet: relationship mass ~ item
		Relationship of mass and item concentrations in different soils (including extreme values)
		entry pathway	mg kg-1 ds	items kg-1 ds	reference
		N/A	0.7	89	Razaei et al. (2019)
		N/A	0.4	51	Razaei et al. (2019)
		N/A	1.0	127	Razaei et al. (2019)
		N/A	0.2	100	Razaei et al. (2019)
		N/A	0.1	53	Razaei et al. (2019)
		N/A	0.3	147	Razaei et al. (2019)
		N/A	0.0	0	Razaei et al. (2019)
		N/A	0.0	0	Razaei et al. (2019)
		N/A	0.0	0	Razaei et al. (2019)
		N/A	0.0	0	Razaei et al. (2019)
		N/A	0.0	0	Razaei et al. (2019)
		N/A	0.0	0	Razaei et al. (2019)
		N/A	0.0	0	Razaei et al. (2019)
		N/A	0.0	0	Razaei et al. (2019)
		N/A	0.0	0	Razaei et al. (2019)
		N/A	0.5	187	Zhang et al. (2018)
		N/A	0.0	0	Zhang et al. (2018)
		N/A	1.2	409	Zhang et al. (2018)
		N/A	0.1	87	Zhang et al. (2018)
		N/A	0.0	0	Zhang et al. (2018)
		N/A	0.2	300	Zhang et al. (2018)
		N/A	12.0	145000	Vollertsen (2017)
		N/A	0.1	53000	Vollertsen (2017)
		N/A	224.3	528000	Vollertsen (2017)
		pm	1.3	200	Razaei et al. (2019)
		pm	0.1	0	Razaei et al. (2019)
		pm	2.5	431	Razaei et al. (2019)
		pm	1.5	267	Razaei et al. (2019)
		pm	0.6	27	Razaei et al. (2019)
		pm	2.4	507	Razaei et al. (2019)
		pm	0.0	0	Razaei et al. (2019)
		pm	0.0	0	Razaei et al. (2019)
		pm	0.0	0	Razaei et al. (2019)
		pm	0.4	156	Razaei et al. (2019)
		pm	0.2	3	Razaei et al. (2019)
		pm	0.6	309	Razaei et al. (2019)
		pm	2.8	400	Razaei et al. (2019)
		pm	2.2	95	Razaei et al. (2019)
		pm	3.4	705	Razaei et al. (2019)
		pm	0.1	163	Zhang et al. (2020)
		pm	0.0	0	Zhang et al. (2020)
		pm	0.7	413	Zhang et al. (2020)
		pm	0.0	75	Zhang et al. (2020)
		pm	0.0	0	Zhang et al. (2020)
		pm	0.0	205	Zhang et al. (2020)
		pm	0.3	80	Zhang et al. (2018)
		pm	0.0	0	Zhang et al. (2018)
		pm	0.8	216	Zhang et al. (2018)
		sew (1x)	1.4	1200	Corradini et al. (2019)
		sew (1x)	0.7	0	Corradini et al. (2019)
		sew (1x)	2.2	2200	Corradini et al. (2019)
		sew (2x)	2.0	1800	Corradini et al. (2019)
		sew (2x)	1.8	1200	Corradini et al. (2019)
		sew (2x)	3.2	3200	Corradini et al. (2019)
		sew (3x)	2.2	1200	Corradini et al. (2019)
		sew (3x)	0.6	200	Corradini et al. (2019)
		sew (3x)	4.6	4400	Corradini et al. (2019)
		sew (4x)	2.9	2200	Corradini et al. (2019)
		sew (4x)	1.8	800	Corradini et al. (2019)
		sew (4x)	12.9	12400	Corradini et al. (2019)
		sew (5x)	4.4	3600	Corradini et al. (2019)
		sew (5x)	1.8	1000	Corradini et al. (2019)
		sew (5x)	10.3	10200	Corradini et al. (2019)
		sew	5.8	71000	Vollertsen (2017)
		sew	0.0	0	Vollertsen (2017)
		sew	16.5	165000	Vollertsen (2017)

## Sheet: MP concentration ~ entry pathways
		Global mass and item concentrations of microplastic sorted by entry pathway
		No	anthrop. influence	mg kg-1 ds	items kg-1 ds	reference
		averages
		1	pm		80	Huang et al. (2020)
		1	pm		308	Huang et al. (2020)
		1	pm		1076	Huang et al. (2020)
		1	pm		70	Liu et al. (2018)
		1	pm	1.3	200	Razaei et al. (2019)
		1	pm	1.5	267	Razaei et al. (2019)
		1	pm	0.0	0	Razaei et al. (2019)
		1	pm	0.4	156	Razaei et al. (2019)
		1	pm	2.8	400	Razaei et al. (2019)
		1	pm	0.3	80	Zhang et al. (2018)
		1	pm	0.1	163	Zhang et al. (2020)
		1	pm	0.0	75	Zhang et al. (2020)
		1	pm		310	Zhou et al. (2020)
		2	sew	1.4	1200	Corradini et al. (2019)
		2	sew	2.0	1800	Corradini et al. (2019)
		2	sew	2.2	1200	Corradini et al. (2019)
		2	sew	2.9	2200	Corradini et al. (2019)
		2	sew	4.4	3600	Corradini et al. (2019)
		2	sew		187	Crossman et al. (2020)
		2	sew		18	Crossman et al. (2020)
		2	sew		541	Crossman et al. (2020)
		2	sew	0.3		Ljung et al. (2018)
		2	sew	3.4		Ljung et al. (2018)
		2	sew		1499	van den Berg et al. (2020)
		2	sew		2664	van den Berg et al. (2020)
		2	sew		1998	van den Berg et al. (2020)
		2	sew		2830	van den Berg et al. (2020)
		2	sew		5328	van den Berg et al. (2020)
		2	sew		3330	van den Berg et al. (2020)
		2	sew		7659	van den Berg et al. (2020)
		2	sew		3330	van den Berg et al. (2020)
		2	sew		2997	van den Berg et al. (2020)
		2	sew		3996	van den Berg et al. (2020)
		2	sew		2831	van den Berg et al. (2020)
		2	sew	5.8	71000	Vollertsen (2017)
		2	sew		1250	Zubris and Richards (2005)
		2	sew		2060	Zubris and Richards (2005)
		2	sew		440	Zubris and Richards (2005)
		2	sew		1220	Zubris and Richards (2005)
		3	road		625	Chen et al. (2020)
		3	road		4375	Chen et al. (2020)
		3	road		1083	Chen et al. (2020)
		3	road		12500	Chen et al. (2020)
		3	road		1300	Chen et al. (2020)
		3	road		1200	Chen et al. (2020)
		3	road		1875	Chen et al. (2020)
		3	road		300	Chen et al. (2020)
		3	road		400	Chen et al. (2020)
		3	road		4500	Chen et al. (2020)
		3	road		500	Chen et al. (2020)
		3	road		550	Chen et al. (2020)
		3	road	915.0		Dierkes et al. (2019)
		4	lit		870	Huerta Lwanga et al. (2017)
		5	ponding		8	Lv et al. (2019)
		5	ponding		10	Lv et al. (2019)
		5	ponding		18	Lv et al. (2019)
		5	ponding		2	Lv et al. (2019)
		5	ponding		3	Lv et al. (2019)
		5	ponding		7	Lv et al. (2019)
		6	multiple		3050	Ding et al. (2020)
		6	multiple		1875	Ding et al. (2020)
		6	multiple		1600	Ding et al. (2020)
		6	multiple		1800	Ding et al. (2020)
		6	multiple		2250	Ding et al. (2020)
		6	multiple		1250	Ding et al. (2020)
		6	multiple		3400	Ding et al. (2020)
		6	multiple		2250	Ding et al. (2020)
		6	multiple		1700	Ding et al. (2020)
		6	multiple		26070	Zhang and Liu (2018)
		6	multiple		12050	Zhang and Liu (2018)
		7	N/A		1083	Chen et al. (2020)
		7	N/A		3167	Chen et al. (2020)
		7	N/A		750	Chen et al. (2020)
		7	N/A		1200	Chen et al. (2020)
		7	N/A		1000	Chen et al. (2020)
		7	N/A		2100	Chen et al. (2020)
		7	N/A		1083	Chen et al. (2020)
		7	N/A		600	Chen et al. (2020)
		7	N/A		4	Crossman et al. (2020)
		7	N/A	2400.0		Fuller and Gautam (2016)
		7	N/A		95	Han et al. (2019)
		7	N/A	0.3		Ljung et al. (2018)
		7	N/A		7220000	Meixner et al. (2019)
		7	N/A		19000000	Meixner et al. (2019)
		7	N/A		8100000	Meixner et al. (2019)
		7	N/A		1990000	Meixner et al. (2019)
		7	N/A		13800000	Meixner et al. (2019)
		7	N/A		11700000	Meixner et al. (2019)
		7	N/A		5180000	Meixner et al. (2019)
		7	N/A		11100000	Meixner et al. (2019)
		7	N/A		3550000	Meixner et al. (2019)
		7	N/A		14100000	Meixner et al. (2019)
		7	N/A		25600000	Meixner et al. (2019)
		7	N/A	0.7	89	Razaei et al. (2019)
		7	N/A	0.2	100	Razaei et al. (2019)
		7	N/A	0.0	0	Razaei et al. (2019)
		7	N/A	0.0	0	Razaei et al. (2019)
		7	N/A	0.0	0	Razaei et al. (2019)
		7	N/A		2498	van den Berg et al. (2020)
		7	N/A		999	van den Berg et al. (2020)
		7	N/A		500	van den Berg et al. (2020)
		7	N/A		999	van den Berg et al. (2020)
		7	N/A		2664	van den Berg et al. (2020)
		7	N/A	12	145000	Vollertsen (2017)
		7	N/A		14440	Zhang and Liu (2018)
		7	N/A	0.5	187	Zhang et al. (2018)
		7	N/A	0.1	87	Zhang et al. (2018)
		8	none		0	Piehl et al. (2018)
		extrema
		1	pm		31	Huang et al. (2020)
		1	pm		129	Huang et al. (2020)
		1	pm		170	Huang et al. (2020)
		1	pm		446	Huang et al. (2020)
		1	pm		729	Huang et al. (2020)
		1	pm		1423	Huang et al. (2020)
		1	pm		57	Liu et al. (2018)
		1	pm		83	Liu et al. (2018)
		1	pm	0.1	0	Razaei et al. (2019)
		1	pm	2.5	431	Razaei et al. (2019)
		1	pm	0.6	27	Razaei et al. (2019)
		1	pm	2.4	507	Razaei et al. (2019)
		1	pm	0.0	0	Razaei et al. (2019)
		1	pm	0.0	0	Razaei et al. (2019)
		1	pm	0.2	3	Razaei et al. (2019)
		1	pm	0.6	309	Razaei et al. (2019)
		1	pm	2.2	95	Razaei et al. (2019)
		1	pm	3.4	705	Razaei et al. (2019)
		1	pm	0.0	0	Zhang et al. (2018)
		1	pm	0.8	216	Zhang et al. (2018)
		1	pm	0.0	0	Zhang et al. (2020)
		1	pm	0.7	413	Zhang et al. (2020)
		1	pm	0.0	0	Zhang et al. (2020)
		1	pm	0.0	205	Zhang et al. (2020)
		1	pm		0	Zhou et al. (2020)
		1	pm		2760	Zhou et al. (2020)
		2	sew	0.7	0	Corradini et al. (2019)
		2	sew	2.2	2200	Corradini et al. (2019)
		2	sew	1.8	1200	Corradini et al. (2019)
		2	sew	3.2	3200	Corradini et al. (2019)
		2	sew	0.6	200	Corradini et al. (2019)
		2	sew	4.6	4400	Corradini et al. (2019)
		2	sew	1.8	800	Corradini et al. (2019)
		2	sew	12.9	12400	Corradini et al. (2019)
		2	sew	1.8	1000	Corradini et al. (2019)
		2	sew	10.3	10200	Corradini et al. (2019)
		2	sew		88	Crossman et al. (2020)
		2	sew		286	Crossman et al. (2020)
		2	sew		14	Crossman et al. (2020)
		2	sew		22	Crossman et al. (2020)
		2	sew		236	Crossman et al. (2020)
		2	sew		846	Crossman et al. (2020)
		2	sew		999	van den Berg et al. (2020)
		2	sew		1998	van den Berg et al. (2020)
		2	sew		999	van den Berg et al. (2020)
		2	sew		3996	van den Berg et al. (2020)
		2	sew		999	van den Berg et al. (2020)
		2	sew		3663	van den Berg et al. (2020)
		2	sew		1998	van den Berg et al. (2020)
		2	sew		3330	van den Berg et al. (2020)
		2	sew		1332	van den Berg et al. (2020)
		2	sew		6327	van den Berg et al. (2020)
		2	sew		1998	van den Berg et al. (2020)
		2	sew		3996	van den Berg et al. (2020)
		2	sew		7326	van den Berg et al. (2020)
		2	sew		7992	van den Berg et al. (2020)
		2	sew		1998	van den Berg et al. (2020)
		2	sew		5328	van den Berg et al. (2020)
		2	sew		2331	van den Berg et al. (2020)
		2	sew		5994	van den Berg et al. (2020)
		2	sew		1998	van den Berg et al. (2020)
		2	sew		8658	van den Berg et al. (2020)
		2	sew		1665	van den Berg et al. (2020)
		2	sew		5994	van den Berg et al. (2020)
		2	sew	0	0	Vollertsen (2017)
		2	sew	16.5	165000	Vollertsen (2017)
		2	sew		1190	Zubris and Richards (2005)
		2	sew		1310	Zubris and Richards (2005)
		2	sew		2060	Zubris and Richards (2005)
		2	sew		2060	Zubris and Richards (2005)
		2	sew		370	Zubris and Richards (2005)
		2	sew		510	Zubris and Richards (2005)
		2	sew		1030	Zubris and Richards (2005)
		2	sew		1410	Zubris and Richards (2005)
		3	road	852.4		Dierkes et al. (2019)
		3	road	977.6		Dierkes et al. (2019)
		4	lit		0	Huerta Lwanga et al. (2017)
		4	lit		2770	Huerta Lwanga et al. (2017)
		5	ponding		6	Lv et al. (2019)
		5	ponding		10	Lv et al. (2019)
		5	ponding		5	Lv et al. (2019)
		5	ponding		15	Lv et al. (2019)
		5	ponding		12	Lv et al. (2019)
		5	ponding		24	Lv et al. (2019)
		5	ponding		1	Lv et al. (2019)
		5	ponding		3	Lv et al. (2019)
		5	ponding		0	Lv et al. (2019)
		5	ponding		6	Lv et al. (2019)
		5	ponding		5	Lv et al. (2019)
		5	ponding		9	Lv et al. (2019)
		6	multiple		2650	Ding et al. (2020)
		6	multiple		3450	Ding et al. (2020)
		6	multiple		1200	Ding et al. (2020)
		6	multiple		2550	Ding et al. (2020)
		6	multiple		750	Ding et al. (2020)
		6	multiple		2450	Ding et al. (2020)
		6	multiple		1650	Ding et al. (2020)
		6	multiple		1950	Ding et al. (2020)
		6	multiple		1900	Ding et al. (2020)
		6	multiple		2600	Ding et al. (2020)
		6	multiple		1167	Ding et al. (2020)
		6	multiple		1333	Ding et al. (2020)
		6	multiple		2870	Ding et al. (2020)
		6	multiple		3930	Ding et al. (2020)
		6	multiple		2125	Ding et al. (2020)
		6	multiple		2375	Ding et al. (2020)
		6	multiple		1525	Ding et al. (2020)
		6	multiple		1875	Ding et al. (2020)
		6	multiple		13470	Zhang and Liu (2018)
		6	multiple		42960	Zhang and Liu (2018)
		6	multiple		7100	Zhang and Liu (2018)
		6	multiple		26630	Zhang and Liu (2018)
		6	multiple		43000	Zhou et al. (2019)
		6	multiple		620000	Zhou et al. (2019)
		6	multiple		96000	Zhou et al. (2019)
		6	multiple		690000	Zhou et al. (2019)
		6	multiple		22000	Zhou et al. (2019)
		6	multiple		200000	Zhou et al. (2019)
		7	N/A			Crossman et al. (2020)
		7	N/A			Crossman et al. (2020)
		7	N/A	300.0		Fuller and Gautam (2016)
		7	N/A	67500.0		Fuller and Gautam (2016)
		7	N/A	0.4	51	Razaei et al. (2019)
		7	N/A	1.0	127	Razaei et al. (2019)
		7	N/A	0.1	53	Razaei et al. (2019)
		7	N/A	0.3	147	Razaei et al. (2019)
		7	N/A	0.0	0	Razaei et al. (2019)
		7	N/A	0.0	0	Razaei et al. (2019)
		7	N/A	0.0	0	Razaei et al. (2019)
		7	N/A	0.0	0	Razaei et al. (2019)
		7	N/A	0.0	0	Razaei et al. (2019)
		7	N/A	0.0	0	Razaei et al. (2019)
		7	N/A		333	van den Berg et al. (2020)
		7	N/A		4662	van den Berg et al. (2020)
		7	N/A		333	van den Berg et al. (2020)
		7	N/A		2331	van den Berg et al. (2020)
		7	N/A		0	van den Berg et al. (2020)
		7	N/A		1332	van den Berg et al. (2020)
		7	N/A		0	van den Berg et al. (2020)
		7	N/A		1332	van den Berg et al. (2020)
		7	N/A		999	van den Berg et al. (2020)
		7	N/A		2664	van den Berg et al. (2020)
		7	none	0.1	53000	Vollertsen (2017)
		7	none	224.3	528000	Vollertsen (2017)
		7	N/A		8189	Zhang and Liu (2018)
		7	N/A		18100	Zhang and Liu (2018)
		7	N/A	0.0	0	Zhang et al. (2018)
		7	N/A	1.2	409	Zhang et al. (2018)
		7	N/A	0.0	0	Zhang et al. (2018)
		7	N/A	0.2	300	Zhang et al. (2018)
		8	none		0	Piehl et al. (2018)
		8	none		1	Piehl et al. (2018)
		quantiles
		1	pm = plastic mulching and plastic greenhouses	0.4	156	Median
		1		0.0	29	25% quantile
		1		1.4	355	75% quantile
		2	sew = sewage sludge and waste water application	2.2	1998	Median
		2		1.7	999	25% quantile
		2		4.5	3616	75% quantile
		3	road = street drain (tire wear)	915.0	1142	Median
		3		883.7	538	25% quantile
		3		946.3	2500	75% quantile
		4	littering	-	870	Median
		4		-	435	25% quantile
		4		-	1820	75% quantile
		5	ponding	-	7	Median
		5		-	4	25% quantile
		5		-	10	75% quantile
		6	multiple = different simultaneous contaminations	-	2550	Median
		6		-	1838	25% quantile
		6		-	12760	75% quantile
		7	N/A = lack of information on contaminations	0.2	999	Median
		7		0.0	70	25% quantile
		7		0.8	11315	75% quantile
		8	none = no contamination	-	0.3	Median
		8		-	0.2	25% quantile
		8		-	0.8	75% quantile
		global average		25	75	max
			items	89	2870	25600000
			mass	0.004	2.65	67500

## Sheet: MP concentration ~ land-use
		Global mass and item concentrations of microplastic sorted by land use
		No	land use	mg kg-1 ds	items kg-1 ds	reference
		averages
		1	agriculture	1.4	1200	Corradini et al. (2019)
		1	agriculture	2.0	1800	Corradini et al. (2019)
		1	agriculture	2.2	1200	Corradini et al. (2019)
		1	agriculture	2.9	2200	Corradini et al. (2019)
		1	agriculture	4.4	3600	Corradini et al. (2019)
		1	agriculture		187	Crossman et al. (2020)
		1	agriculture		18	Crossman et al. (2020)
		1	agriculture		541	Crossman et al. (2020)
		1	agriculture		4	Crossman et al. (2020)
		1	agriculture		3050	Ding et al. (2020)
		1	agriculture		1875	Ding et al. (2020)
		1	agriculture		1600	Ding et al. (2020)
		1	agriculture		1800	Ding et al. (2020)
		1	agriculture		2250	Ding et al. (2020)
		1	agriculture		1250	Ding et al. (2020)
		1	agriculture		3400	Ding et al. (2020)
		1	agriculture		2250	Ding et al. (2020)
		1	agriculture		1700	Ding et al. (2020)
		1	agriculture		80	Huang et al. (2020)
		1	agriculture		308	Huang et al. (2020)
		1	agriculture		1076	Huang et al. (2020)
		1	agriculture	0.3		Ljung et al. (2018)
		1	agriculture	3.4		Ljung et al. (2018)
		1	agriculture	0.3		Ljung et al. (2018)
		1	agriculture		8	Lv et al. (2019)
		1	agriculture		10	Lv et al. (2019)
		1	agriculture		18	Lv et al. (2019)
		1	agriculture		2	Lv et al. (2019)
		1	agriculture		3	Lv et al. (2019)
		1	agriculture		7	Lv et al. (2019)
		1	agriculture		0	Piehl et al. (2018)
		1	agriculture	1.3	200	Razaei et al. (2019)
		1	agriculture	1.5	267	Razaei et al. (2019)
		1	agriculture	0.0	0	Razaei et al. (2019)
		1	agriculture	0.4	156	Razaei et al. (2019)
		1	agriculture	2.8	400	Razaei et al. (2019)
		1	agriculture		1499	van den Berg et al. (2020)
		1	agriculture		2664	van den Berg et al. (2020)
		1	agriculture		1998	van den Berg et al. (2020)
		1	agriculture		2830	van den Berg et al. (2020)
		1	agriculture		5328	van den Berg et al. (2020)
		1	agriculture		3330	van den Berg et al. (2020)
		1	agriculture		7659	van den Berg et al. (2020)
		1	agriculture		3330	van den Berg et al. (2020)
		1	agriculture		2997	van den Berg et al. (2020)
		1	agriculture		3996	van den Berg et al. (2020)
		1	agriculture		2831	van den Berg et al. (2020)
		1	agriculture		2498	van den Berg et al. (2020)
		1	agriculture		999	van den Berg et al. (2020)
		1	agriculture		500	van den Berg et al. (2020)
		1	agriculture	5.8	71000	Vollertsen (2017)
		1	agriculture	12	145000	Vollertsen (2017)
		1	agriculture		26070	Zhang and Liu (2018)
		1	agriculture		12050	Zhang and Liu (2018)
		1	agriculture	0.3	80	Zhang et al. (2018)
		1	agriculture	0.1	163	Zhang et al. (2020)
		1	agriculture	0.0	75	Zhang et al. (2020)
		1	agriculture		310	Zhou et al. (2020)
		2	horticulture		625	Chen et al. (2020)
		2	horticulture		4375	Chen et al. (2020)
		2	horticulture		1083	Chen et al. (2020)
		2	horticulture		12500	Chen et al. (2020)
		2	horticulture		1300	Chen et al. (2020)
		2	horticulture		1200	Chen et al. (2020)
		2	horticulture		1875	Chen et al. (2020)
		2	horticulture		300	Chen et al. (2020)
		2	horticulture		400	Chen et al. (2020)
		2	horticulture		4500	Chen et al. (2020)
		2	horticulture		500	Chen et al. (2020)
		2	horticulture		550	Chen et al. (2020)
		2	horticulture		1083	Chen et al. (2020)
		2	horticulture		3167	Chen et al. (2020)
		2	horticulture		750	Chen et al. (2020)
		2	horticulture		1200	Chen et al. (2020)
		2	horticulture		1000	Chen et al. (2020)
		2	horticulture		2100	Chen et al. (2020)
		2	horticulture		1083	Chen et al. (2020)
		2	horticulture		600	Chen et al. (2020)
		2	horticulture		870	Huerta Lwanga et al. (2017)
		2	horticulture		70	Liu et al. (2018)
		2	orchard		999	van den Berg et al. (2020)
		2	orchard		2664	van den Berg et al. (2020)
		2	horticulture	0.1	87	Zhang et al. (2018)
		2	orchard	0.5	187	Zhang et al. (2018)
		2	orchard		1250	Zubris and Richards (2005)
		3	grassland	0.7	89	Razaei et al. (2019)
		3	grassland	0.2	100	Razaei et al. (2019)
		3	grassland	0.0	0	Razaei et al. (2019)
		3	grassland	0.0	0	Razaei et al. (2019)
		3	grassland	0.0	0	Razaei et al. (2019)
		5	forest		14440	Zhang and Liu (2018)
		6	N/A	915.0		Dierkes et al. (2019)
		6	N/A	2400.0		Fuller and Gautam (2016)
		6	N/A		95	Han et al. (2019)
		6	N/A		7220000	Meixner et al. (2019)
		6	N/A		19000000	Meixner et al. (2019)
		6	N/A		8100000	Meixner et al. (2019)
		6	N/A		1990000	Meixner et al. (2019)
		6	N/A		13800000	Meixner et al. (2019)
		6	N/A		11700000	Meixner et al. (2019)
		6	N/A		5180000	Meixner et al. (2019)
		6	N/A		11100000	Meixner et al. (2019)
		6	N/A		3550000	Meixner et al. (2019)
		6	N/A		14100000	Meixner et al. (2019)
		6	N/A		25600000	Meixner et al. (2019)
		6	N/A		2060	Zubris and Richards (2005)
		6	N/A		440	Zubris and Richards (2005)
		6	N/A		1220	Zubris and Richards (2005)
		extrema
		1	agriculture	0.7	0	Corradini et al. (2019)
		1	agriculture	2.2	2200	Corradini et al. (2019)
		1	agriculture	1.8	1200	Corradini et al. (2019)
		1	agriculture	3.2	3200	Corradini et al. (2019)
		1	agriculture	0.6	200	Corradini et al. (2019)
		1	agriculture	4.6	4400	Corradini et al. (2019)
		1	agriculture	1.8	800	Corradini et al. (2019)
		1	agriculture	12.9	12400	Corradini et al. (2019)
		1	agriculture	1.8	1000	Corradini et al. (2019)
		1	agriculture	10.3	10200	Corradini et al. (2019)
		1	agriculture		88	Crossman et al. (2020)
		1	agriculture		286	Crossman et al. (2020)
		1	agriculture		14	Crossman et al. (2020)
		1	agriculture		22	Crossman et al. (2020)
		1	agriculture		236	Crossman et al. (2020)
		1	agriculture		846	Crossman et al. (2020)
		1	agriculture			Crossman et al. (2020)
		1	agriculture			Crossman et al. (2020)
		1	agriculture		2650	Ding et al. (2020)
		1	agriculture		3450	Ding et al. (2020)
		1	agriculture		1200	Ding et al. (2020)
		1	agriculture		2550	Ding et al. (2020)
		1	agriculture		750	Ding et al. (2020)
		1	agriculture		2450	Ding et al. (2020)
		1	agriculture		1650	Ding et al. (2020)
		1	agriculture		1950	Ding et al. (2020)
		1	agriculture		1900	Ding et al. (2020)
		1	agriculture		2600	Ding et al. (2020)
		1	agriculture		1167	Ding et al. (2020)
		1	agriculture		1333	Ding et al. (2020)
		1	agriculture		2870	Ding et al. (2020)
		1	agriculture		3930	Ding et al. (2020)
		1	agriculture		2125	Ding et al. (2020)
		1	agriculture		2375	Ding et al. (2020)
		1	agriculture		1525	Ding et al. (2020)
		1	agriculture		1875	Ding et al. (2020)
		1	agriculture		31	Huang et al. (2020)
		1	agriculture		129	Huang et al. (2020)
		1	agriculture		170	Huang et al. (2020)
		1	agriculture		446	Huang et al. (2020)
		1	agriculture		729	Huang et al. (2020)
		1	agriculture		1423	Huang et al. (2020)
		1	agriculture		6	Lv et al. (2019)
		1	agriculture		10	Lv et al. (2019)
		1	agriculture		5	Lv et al. (2019)
		1	agriculture		15	Lv et al. (2019)
		1	agriculture		12	Lv et al. (2019)
		1	agriculture		24	Lv et al. (2019)
		1	agriculture		1	Lv et al. (2019)
		1	agriculture		3	Lv et al. (2019)
		1	agriculture		0	Lv et al. (2019)
		1	agriculture		6	Lv et al. (2019)
		1	agriculture		5	Lv et al. (2019)
		1	agriculture		9	Lv et al. (2019)
		1	agriculture		0	Piehl et al. (2018)
		1	agriculture		1	Piehl et al. (2018)
		1	agriculture	0.1	0	Razaei et al. (2019)
		1	agriculture	2.5	431	Razaei et al. (2019)
		1	agriculture	0.6	27	Razaei et al. (2019)
		1	agriculture	2.4	507	Razaei et al. (2019)
		1	agriculture	0.0	0	Razaei et al. (2019)
		1	agriculture	0.0	0	Razaei et al. (2019)
		1	agriculture	0.2	3	Razaei et al. (2019)
		1	agriculture	0.6	309	Razaei et al. (2019)
		1	agriculture	2.2	95	Razaei et al. (2019)
		1	agriculture	3.4	705	Razaei et al. (2019)
		1	agriculture		720	van den Berg et al. (2019)
		1	agriculture		3340	van den Berg et al. (2019)
		1	agriculture		999	van den Berg et al. (2020)
		1	agriculture		1998	van den Berg et al. (2020)
		1	agriculture		999	van den Berg et al. (2020)
		1	agriculture		3996	van den Berg et al. (2020)
		1	agriculture		999	van den Berg et al. (2020)
		1	agriculture		3663	van den Berg et al. (2020)
		1	agriculture		1998	van den Berg et al. (2020)
		1	agriculture		3330	van den Berg et al. (2020)
		1	agriculture		1332	van den Berg et al. (2020)
		1	agriculture		6327	van den Berg et al. (2020)
		1	agriculture		1998	van den Berg et al. (2020)
		1	agriculture		3996	van den Berg et al. (2020)
		1	agriculture		7326	van den Berg et al. (2020)
		1	agriculture		7992	van den Berg et al. (2020)
		1	agriculture		1998	van den Berg et al. (2020)
		1	agriculture		5328	van den Berg et al. (2020)
		1	agriculture		2331	van den Berg et al. (2020)
		1	agriculture		5994	van den Berg et al. (2020)
		1	agriculture		1998	van den Berg et al. (2020)
		1	agriculture		8658	van den Berg et al. (2020)
		1	agriculture		1665	van den Berg et al. (2020)
		1	agriculture		5994	van den Berg et al. (2020)
		1	agriculture		333	van den Berg et al. (2020)
		1	agriculture		4662	van den Berg et al. (2020)
		1	agriculture		333	van den Berg et al. (2020)
		1	agriculture		2331	van den Berg et al. (2020)
		1	agriculture		0	van den Berg et al. (2020)
		1	agriculture		1332	van den Berg et al. (2020)
		1	agriculture	0	0	Vollertsen (2017)
		1	agriculture	16.5	165000	Vollertsen (2017)
		1	agriculture	0.1	53000	Vollertsen (2017)
		1	agriculture	224.3	528000	Vollertsen (2017)
		1	agriculture		13470	Zhang and Liu (2018)
		1	agriculture		42960	Zhang and Liu (2018)
		1	agriculture		7100	Zhang and Liu (2018)
		1	agriculture		26630	Zhang and Liu (2018)
		1	agriculture	0.0	0	Zhang et al. (2018)
		1	agriculture	0.8	216	Zhang et al. (2018)
		1	agriculture	2.8	400	Zhang et al. (2020)
		1	agriculture	2.2	95	Zhang et al. (2020)
		1	agriculture	0.1	0	Zhang et al. (2020)
		1	agriculture	0.0	205	Zhang et al. (2020)
		1	agriculture		0	Zhou et al. (2020)
		1	agriculture		2760	Zhou et al. (2020)
		2	horticulture		0	Huerta Lwanga et al. (2017)
		2	horticulture		2770	Huerta Lwanga et al. (2017)
		2	horticulture		57	Liu et al. (2018)
		2	horticulture		83	Liu et al. (2018)
		2	orchard		0	van den Berg et al. (2020)
		2	orchard		1332	van den Berg et al. (2020)
		2	orchard		999	van den Berg et al. (2020)
		2	orchard		2664	van den Berg et al. (2020)
		2	horticulture	0.0	0	Zhang et al. (2018)
		2	horticulture	0.2	300	Zhang et al. (2018)
		2	orchard	0.0	0	Zhang et al. (2018)
		2	orchard	1.2	409	Zhang et al. (2018)
		2	horticulture		43000	Zhou et al. (2019)
		2	horticulture		620000	Zhou et al. (2019)
		2	orchard		1190	Zubris and Richards (2005)
		2	orchard		1310	Zubris and Richards (2005)
		3	grassland	0.4	51	Razaei et al. (2019)
		3	grassland	1.0	127	Razaei et al. (2019)
		3	grassland	0.1	53	Razaei et al. (2019)
		3	grassland	0.3	147	Razaei et al. (2019)
		3	grassland	0.0	0	Razaei et al. (2019)
		3	grassland	0.0	0	Razaei et al. (2019)
		3	grassland	0.0	0	Razaei et al. (2019)
		3	grassland	0.0	0	Razaei et al. (2019)
		3	grassland	0.0	0	Razaei et al. (2019)
		3	grassland	0.0	0	Razaei et al. (2019)
		4	fallow		22000	Zhou et al. (2019)
		4	fallow		200000	Zhou et al. (2019)
		5	forest		8189	Zhang and Liu (2018)
		5	forest		18100	Zhang and Liu (2018)
		5	forest		96000	Zhou et al. (2019)
		5	forest		690000	Zhou et al. (2019)
		6	N/A	852.4		Dierkes et al. (2019)
		6	N/A	977.6		Dierkes et al. (2019)
		6	N/A	300.0		Fuller and Gautam (2016)
		6	N/A	67500.0		Fuller and Gautam (2016)
		6	N/A		2060	Zubris and Richards (2005)
		6	N/A		2060	Zubris and Richards (2005)
		6	N/A		370	Zubris and Richards (2005)
		6	N/A		510	Zubris and Richards (2005)
		6	N/A		1030	Zubris and Richards (2005)
		6	N/A		1410	Zubris and Richards (2005)
		quantiles
		1		1.7	1200.0	Median
		1		0.3	88.0	25% quantile
		1		2.8	2830.0	75% quantile
		2		0.2	1000.0	Median
		2		0.0	350.0	25% quantile
		2		0.4	1603.5	75% quantile
		3		0.0	0.0	Median
		3		0.0	0.0	25% quantile
		3		0.3	71.0	75% quantile
		4		-	111000.0	Median
		4		-	66500.0	25% quantile
		4		-	155500.0	75% quantile
		5		-	18100.0	Median
		5		-	14440.0	25% quantile
		5		-	96000.0	75% quantile
		6		946.3	1990000.0	Median
		6		868.1	1220.0	25% quantile
		6		2044.4	11100000.0	75% quantile

## Sheet: MP concentration ~ vicinity
		Global mass and item concentrations of microplastic sorted by vicinity
		No	vicinity	mg kg-1 ds	items kg-1 ds	reference
		averages
		1	municipal		625	Chen et al. (2020)
		1	municipal		4375	Chen et al. (2020)
		1	municipal		1083	Chen et al. (2020)
		1	municipal		12500	Chen et al. (2020)
		1	municipal		1300	Chen et al. (2020)
		1	municipal		1200	Chen et al. (2020)
		1	municipal		1875	Chen et al. (2020)
		1	municipal		300	Chen et al. (2020)
		1	municipal		400	Chen et al. (2020)
		1	municipal		4500	Chen et al. (2020)
		1	municipal		500	Chen et al. (2020)
		1	municipal		550	Chen et al. (2020)
		1	municipal		1083	Chen et al. (2020)
		1	municipal		3167	Chen et al. (2020)
		1	municipal		750	Chen et al. (2020)
		1	municipal		1200	Chen et al. (2020)
		1	municipal		1000	Chen et al. (2020)
		1	municipal		2100	Chen et al. (2020)
		1	municipal		1083	Chen et al. (2020)
		1	municipal		600	Chen et al. (2020)
		1	municipal	1.4	1200	Corradini et al. (2019)
		1	municipal	2.0	1800	Corradini et al. (2019)
		1	municipal	2.2	1200	Corradini et al. (2019)
		1	municipal	2.9	2200	Corradini et al. (2019)
		1	municipal	4.4	3600	Corradini et al. (2019)
		1	municipal	915.0		Dierkes et al. (2019)
		1	municipal		3050	Ding et al. (2020)
		1	municipal		1875	Ding et al. (2020)
		1	municipal		1600	Ding et al. (2020)
		1	municipal		1800	Ding et al. (2020)
		1	municipal		2250	Ding et al. (2020)
		1	municipal		1250	Ding et al. (2020)
		1	municipal		3400	Ding et al. (2020)
		1	municipal		2250	Ding et al. (2020)
		1	municipal		1700	Ding et al. (2020)
		1	municipal		95	Han et al. (2019)
		1	municipal		80	Huang et al. (2020)
		1	municipal		308	Huang et al. (2020)
		1	municipal		1076	Huang et al. (2020)
_		1	municipal		70	Liu et al. (2018)
		1	municipal	0.3		Ljung et al. (2018)
		1	municipal	3.4		Ljung et al. (2018)
		1	municipal	0.3		Ljung et al. (2018)
		1	municipal		8	Lv et al. (2019)
		1	municipal		10	Lv et al. (2019)
		1	municipal		18	Lv et al. (2019)
		1	municipal		2	Lv et al. (2019)
		1	municipal		3	Lv et al. (2019)
		1	municipal		7	Lv et al. (2019)
		1	municipal		7220000	Meixner et al. (2019)
		1	municipal		19000000	Meixner et al. (2019)
		1	municipal		8100000	Meixner et al. (2019)
		1	municipal		1990000	Meixner et al. (2019)
		1	municipal		13800000	Meixner et al. (2019)
		1	municipal		11700000	Meixner et al. (2019)
		1	municipal		5180000	Meixner et al. (2019)
		1	municipal		11100000	Meixner et al. (2019)
		1	municipal		3550000	Meixner et al. (2019)
		1	municipal		14100000	Meixner et al. (2019)
		1	municipal		25600000	Meixner et al. (2019)
		1	municipal		2498	van den Berg et al. (2020)
		1	municipal		26070	Zhang and Liu (2018)
		1	municipal		12050	Zhang and Liu (2018)
		1	municipal		14440	Zhang and Liu (2018)
		1	municipal	0.1	163	Zhang et al. (2020)
		1	municipal		310	Zhou et al. (2020)
		1	municipal		1250	Zubris and Richards (2005)
		1	municipal		2060	Zubris and Richards (2005)
		1	municipal		440	Zubris and Richards (2005)
		1	municipal		1220	Zubris and Richards (2005)
		2	rural		18	Crossman et al. (2020)
		2	rural		541	Crossman et al. (2020)
		2	rural		187	Crossman et al. (2020)
		2	rural		4	Crossman et al. (2020)
		2	rural		870	Huerta Lwanga et al. (2017)
		2	rural		0	Piehl et al. (2018)
		2	rural	1.3	200	Razaei et al. (2019)
		2	rural	1.5	267	Razaei et al. (2019)
		2	rural	0.0	0	Razaei et al. (2019)
		2	rural	0.4	156	Razaei et al. (2019)
		2	rural	2.8	400	Razaei et al. (2019)
		2	rural	0.7	89	Razaei et al. (2019)
		2	rural	0.2	100	Razaei et al. (2019)
		2	rural	0.0	0	Razaei et al. (2019)
		2	rural	0.0	0	Razaei et al. (2019)
		2	rural	0.0	0	Razaei et al. (2019)
		2	rural		1499	van den Berg et al. (2020)
		2	rural		2664	van den Berg et al. (2020)
		2	rural		2830	van den Berg et al. (2020)
		2	rural		5328	van den Berg et al. (2020)
		2	rural		7659	van den Berg et al. (2020)
		2	rural		2997	van den Berg et al. (2020)
		2	rural		3996	van den Berg et al. (2020)
		2	rural		500	van den Berg et al. (2020)
		2	rural		999	van den Berg et al. (2020)
		2	rural	0.3	80	Zhang et al. (2018)
		2	rural	0.1	87	Zhang et al. (2018)
		2	rural	0.5	187	Zhang et al. (2018)
		2	rural	0.0	75	Zhang et al. (2020)
		3	industrial	2400.0		Fuller and Gautam (2016)
		4	N/A		1998	van den Berg et al. (2020)
		4	N/A		3330	van den Berg et al. (2020)
		4	N/A		3330	van den Berg et al. (2020)
		4	N/A		2831	van den Berg et al. (2020)
		4	N/A		999	van den Berg et al. (2020)
		4	N/A		2664	van den Berg et al. (2020)
		4	N/A	5.8	71000	Vollertsen (2017)
		4	N/A	12	145000	Vollertsen (2017)
		extrema
		1	municipal	0.7	0	Corradini et al. (2019)
		1	municipal	2.2	2200	Corradini et al. (2019)
		1	municipal	1.8	1200	Corradini et al. (2019)
		1	municipal	3.2	3200	Corradini et al. (2019)
		1	municipal	0.6	200	Corradini et al. (2019)
		1	municipal	4.6	4400	Corradini et al. (2019)
		1	municipal	1.8	800	Corradini et al. (2019)
		1	municipal	12.9	12400	Corradini et al. (2019)
		1	municipal	1.8	1000	Corradini et al. (2019)
		1	municipal	10.3	10200	Corradini et al. (2019)
		1	municipal	852.4		Dierkes et al. (2019)
		1	municipal	977.6		Dierkes et al. (2019)
		1	municipal		2650	Ding et al. (2020)
		1	municipal		3450	Ding et al. (2020)
		1	municipal		1200	Ding et al. (2020)
		1	municipal		2550	Ding et al. (2020)
		1	municipal		750	Ding et al. (2020)
		1	municipal		2450	Ding et al. (2020)
		1	municipal		1650	Ding et al. (2020)
		1	municipal		1950	Ding et al. (2020)
		1	municipal		1900	Ding et al. (2020)
		1	municipal		2600	Ding et al. (2020)
		1	municipal		1167	Ding et al. (2020)
		1	municipal		1333	Ding et al. (2020)
		1	municipal		2870	Ding et al. (2020)
		1	municipal		3930	Ding et al. (2020)
		1	municipal		2125	Ding et al. (2020)
		1	municipal		2375	Ding et al. (2020)
		1	municipal		1525	Ding et al. (2020)
		1	municipal		1875	Ding et al. (2020)
		1	municipal		31	Huang et al. (2020)
		1	municipal		129	Huang et al. (2020)
		1	municipal		170	Huang et al. (2020)
		1	municipal		446	Huang et al. (2020)
		1	municipal		729	Huang et al. (2020)
		1	municipal		1423	Huang et al. (2020)
		1	municipal		57	Liu et al. (2018)
		1	municipal		83	Liu et al. (2018)
		1	municipal		6	Lv et al. (2019)
		1	municipal		10	Lv et al. (2019)
		1	municipal		5	Lv et al. (2019)
		1	municipal		15	Lv et al. (2019)
		1	municipal		12	Lv et al. (2019)
		1	municipal		24	Lv et al. (2019)
		1	municipal		1	Lv et al. (2019)
		1	municipal		3	Lv et al. (2019)
		1	municipal		0	Lv et al. (2019)
		1	municipal		6	Lv et al. (2019)
		1	municipal		5	Lv et al. (2019)
		1	municipal		9	Lv et al. (2019)
		1	municipal		333	van den Berg et al. (2020)
		1	municipal		4662	van den Berg et al. (2020)
		1	municipal		13470	Zhang and Liu (2018)
		1	municipal		42960	Zhang and Liu (2018)
		1	municipal		7100	Zhang and Liu (2018)
		1	municipal		26630	Zhang and Liu (2018)
		1	municipal		8189	Zhang and Liu (2018)
		1	municipal		18100	Zhang and Liu (2018)
		1	municipal	0.0	0	Zhang et al. (2020)
		1	municipal	0.7	413	Zhang et al. (2020)
		1	municipal		0	Zhou et al. (2020)
		1	municipal		2760	Zhou et al. (2020)
		1	municipal		1190	Zubris and Richards (2005)
		1	municipal		1310	Zubris and Richards (2005)
		1	municipal		2060	Zubris and Richards (2005)
		1	municipal		2060	Zubris and Richards (2005)
		1	municipal		370	Zubris and Richards (2005)
		1	municipal		510	Zubris and Richards (2005)
		1	municipal		1030	Zubris and Richards (2005)
		1	municipal		1410	Zubris and Richards (2005)
		2	rural		88	Crossman et al. (2020)
		2	rural		286	Crossman et al. (2020)
		2	rural			Crossman et al. (2020)
		2	rural			Crossman et al. (2020)
		2	rural		14	Crossman et al. (2020)
		2	rural		22	Crossman et al. (2020)
		2	rural		236	Crossman et al. (2020)
		2	rural		846	Crossman et al. (2020)
		2	rural		0	Huerta Lwanga et al. (2017)
		2	rural		2770	Huerta Lwanga et al. (2017)
		2	rural		0	Piehl et al. (2018)
		2	rural		1	Piehl et al. (2018)
		2	rural	0.1	0	Razaei et al. (2019)
		2	rural	2.5	431	Razaei et al. (2019)
		2	rural	0.6	27	Razaei et al. (2019)
		2	rural	2.4	507	Razaei et al. (2019)
		2	rural	0.0	0	Razaei et al. (2019)
		2	rural	0.0	0	Razaei et al. (2019)
		2	rural	0.2	3	Razaei et al. (2019)
		2	rural	0.6	309	Razaei et al. (2019)
		2	rural	2.2	95	Razaei et al. (2019)
		2	rural	3.4	705	Razaei et al. (2019)
		2	rural	0.4	51	Razaei et al. (2019)
		2	rural	1.0	127	Razaei et al. (2019)
		2	rural	0.1	53	Razaei et al. (2019)
		2	rural	0.3	147	Razaei et al. (2019)
		2	rural	0.0	0	Razaei et al. (2019)
		2	rural	0.0	0	Razaei et al. (2019)
		2	rural	0.0	0	Razaei et al. (2019)
		2	rural	0.0	0	Razaei et al. (2019)
		2	rural	0.0	0	Razaei et al. (2019)
		2	rural	0.0	0	Razaei et al. (2019)
		2	rural		999	van den Berg et al. (2020)
		2	rural		1998	van den Berg et al. (2020)
		2	rural		999	van den Berg et al. (2020)
		2	rural		3996	van den Berg et al. (2020)
		2	rural		1998	van den Berg et al. (2020)
		2	rural		3330	van den Berg et al. (2020)
		2	rural		1332	van den Berg et al. (2020)
		2	rural		6327	van den Berg et al. (2020)
		2	rural		7326	van den Berg et al. (2020)
		2	rural		7992	van den Berg et al. (2020)
		2	rural		2331	van den Berg et al. (2020)
		2	rural		5994	van den Berg et al. (2020)
		2	rural		1998	van den Berg et al. (2020)
		2	rural		8658	van den Berg et al. (2020)
		2	rural		0	van den Berg et al. (2020)
		2	rural		1332	van den Berg et al. (2020)
		2	rural		0	van den Berg et al. (2020)
		2	rural		1332	van den Berg et al. (2020)
		2	rural	0.0	0	Zhang et al. (2018)
		2	rural	0.2	300	Zhang et al. (2018)
		2	rural	0.0	0	Zhang et al. (2018)
		2	rural	1.2	409	Zhang et al. (2018)
		2	rural	0.0	0	Zhang et al. (2018)
		2	rural	0.8	216	Zhang et al. (2018)
		2	rural	0.0	0	Zhang et al. (2020)
		2	rural	0.0	205	Zhang et al. (2020)
		3	industrial	300.0		Fuller and Gautam (2016)
		3	industrial	67500.0		Fuller and Gautam (2016)
		3	industrial		43000	Zhou et al. (2019)
		3	industrial		620000	Zhou et al. (2019)
		3	industrial		22000	Zhou et al. (2019)
		3	industrial		200000	Zhou et al. (2019)
		3	industrial		96000	Zhou et al. (2019)
		3	industrial		690000	Zhou et al. (2019)
		4	N/A		999	van den Berg et al. (2020)
		4	N/A		3663	van den Berg et al. (2020)
		4	N/A		1998	van den Berg et al. (2020)
		4	N/A		3996	van den Berg et al. (2020)
		4	N/A		1998	van den Berg et al. (2020)
		4	N/A		5328	van den Berg et al. (2020)
		4	N/A		1665	van den Berg et al. (2020)
		4	N/A		5994	van den Berg et al. (2020)
		4	N/A		333	van den Berg et al. (2020)
		4	N/A		2331	van den Berg et al. (2020)
		4	N/A		999	van den Berg et al. (2020)
		4	N/A		2664	van den Berg et al. (2020)
		4	N/A	0	0	Vollertsen (2017)
		4	N/A	16.5	165000	Vollertsen (2017)
		4	N/A	0.1	53000	Vollertsen (2017)
		4	N/A	224.3	528000	Vollertsen (2017)
		quantiles
		1	municipal	2.1	1275.0	Median
		1		0.7	315.8	25% quantile
		1		4.5	3005.0	75% quantile
		2	rural	0.2	187.0	Median
		2		0.0	0.3	25% quantile
		2		0.7	1332.0	75% quantile
		3	industrial	2400.0	148000.0	Median
		3		1350.0	56250.0	25% quantile
		3		34950.0	515000.0	75% quantile
		4	N/A	8.9	2747.5	Median
		4		1.5	1914.8	25% quantile
		4		15.4	5494.5	75% quantile

## Sheet: MP concentration ~ pre-treatment
		Global mass and item concentrations of microplastic sorted by treatment
		No	treatment	mg kg-1 ds	items kg-1 ds	reference
		averages
		1	no		625	Chen et al. (2020)
		1	no		4375	Chen et al. (2020)
		1	no		1083	Chen et al. (2020)
		1	no		12500	Chen et al. (2020)
		1	no		1300	Chen et al. (2020)
		1	no		1200	Chen et al. (2020)
		1	no		1875	Chen et al. (2020)
		1	no		300	Chen et al. (2020)
		1	no		400	Chen et al. (2020)
		1	no		4500	Chen et al. (2020)
		1	no		500	Chen et al. (2020)
		1	no		550	Chen et al. (2020)
		1	no		1083	Chen et al. (2020)
		1	no		3167	Chen et al. (2020)
		1	no		750	Chen et al. (2020)
		1	no		1200	Chen et al. (2020)
		1	no		1000	Chen et al. (2020)
		1	no		2100	Chen et al. (2020)
		1	no		1083	Chen et al. (2020)
		1	no		600	Chen et al. (2020)
		1	no	1.4	1200	Corradini et al. (2019)
		1	no	2.0	1800	Corradini et al. (2019)
		1	no	2.2	1200	Corradini et al. (2019)
		1	no	2.9	2200	Corradini et al. (2019)
		1	no	4.4	3600	Corradini et al. (2019)
		1	no		870	Huerta Lwanga et al. (2017)
		1	no	1.3	200	Razaei et al. (2019)
		1	no	1.5	267	Razaei et al. (2019)
		1	no	0.0	0	Razaei et al. (2019)
		1	no	0.4	156	Razaei et al. (2019)
		1	no	2.8	400	Razaei et al. (2019)
		1	no	0.7	89	Razaei et al. (2019)
		1	no	0.2	100	Razaei et al. (2019)
		1	no	0.0	0	Razaei et al. (2019)
		1	no	0.0	0	Razaei et al. (2019)
		1	no	0.0	0	Razaei et al. (2019)
		1	no		1499	van den Berg et al. (2020)
		1	no		2664	van den Berg et al. (2020)
		1	no		1998	van den Berg et al. (2020)
		1	no		2830	van den Berg et al. (2020)
		1	no		5328	van den Berg et al. (2020)
		1	no		3330	van den Berg et al. (2020)
		1	no		7659	van den Berg et al. (2020)
		1	no		3330	van den Berg et al. (2020)
		1	no		2997	van den Berg et al. (2020)
		1	no		3996	van den Berg et al. (2020)
		1	no		2831	van den Berg et al. (2020)
		1	no		2498	van den Berg et al. (2020)
		1	no		999	van den Berg et al. (2020)
		1	no		500	van den Berg et al. (2020)
		1	no		999	van den Berg et al. (2020)
		1	no		2664	van den Berg et al. (2020)
		1	no	0.3	80	Zhang et al. (2018)
		1	no	0.5	187	Zhang et al. (2018)
		1	no	0.1	87	Zhang et al. (2018)
		1	no	0.1	163	Zhang et al. (2020)
		1	no	0.0	75	Zhang et al. (2020)
		1	no		1250	Zubris and Richards (2005)
		1	no		2060	Zubris and Richards (2005)
		1	no		440	Zubris and Richards (2005)
		1	no		1220	Zubris and Richards (2005)
		2	pre		187	Crossman et al. (2020)
		2	pre		18	Crossman et al. (2020)
		2	pre		541	Crossman et al. (2020)
		2	pre		4	Crossman et al. (2020)
		2	pre	0.3		Ljung et al. (2018)
		2	pre	3.4		Ljung et al. (2018)
		2	pre	0.3		Ljung et al. (2018)
		2	pre		7220000	Meixner et al. (2019)
		2	pre		19000000	Meixner et al. (2019)
		2	pre		8100000	Meixner et al. (2019)
		2	pre		1990000	Meixner et al. (2019)
		2	pre		13800000	Meixner et al. (2019)
		2	pre		11700000	Meixner et al. (2019)
		2	pre		5180000	Meixner et al. (2019)
		2	pre		11100000	Meixner et al. (2019)
		2	pre		3550000	Meixner et al. (2019)
		2	pre		14100000	Meixner et al. (2019)
		2	pre		25600000	Meixner et al. (2019)
		2	pre	5.8	71000	Vollertsen (2017)
		2	pre	12	145000	Vollertsen (2017)
		2	pre		26070	Zhang and Liu (2018)
		2	pre		12050	Zhang and Liu (2018)
		2	pre		14440	Zhang and Liu (2018)
		3	post		3050	Ding et al. (2020)
		3	post		1875	Ding et al. (2020)
		3	post		1600	Ding et al. (2020)
		3	post		1800	Ding et al. (2020)
		3	post		2250	Ding et al. (2020)
		3	post		1250	Ding et al. (2020)
		3	post		3400	Ding et al. (2020)
		3	post		2250	Ding et al. (2020)
		3	post		1700	Ding et al. (2020)
		3	post		95	Han et al. (2019)
		3	post		80	Huang et al. (2020)
		3	post		308	Huang et al. (2020)
		3	post		1076	Huang et al. (2020)
		3	post		70	Liu et al. (2018)
		3	post		8	Lv et al. (2019)
		3	post		10	Lv et al. (2019)
		3	post		18	Lv et al. (2019)
		3	post		2	Lv et al. (2019)
		3	post		3	Lv et al. (2019)
		3	post		7	Lv et al. (2019)
		3	post		310	Zhou et al. (2020)
		extrema
		1	no	0.7	0	Corradini et al. (2019)
		1	no	2.2	2200	Corradini et al. (2019)
		1	no	1.8	1200	Corradini et al. (2019)
		1	no	3.2	3200	Corradini et al. (2019)
		1	no	0.6	200	Corradini et al. (2019)
		1	no	4.6	4400	Corradini et al. (2019)
		1	no	1.8	800	Corradini et al. (2019)
		1	no	12.9	12400	Corradini et al. (2019)
		1	no	1.8	1000	Corradini et al. (2019)
		1	no	10.3	10200	Corradini et al. (2019)
		1	no		0	Huerta Lwanga et al. (2017)
		1	no		2770	Huerta Lwanga et al. (2017)
		1	no	0.1	0	Razaei et al. (2019)
		1	no	2.5	431	Razaei et al. (2019)
		1	no	0.6	27	Razaei et al. (2019)
		1	no	2.4	507	Razaei et al. (2019)
		1	no	0.0	0	Razaei et al. (2019)
		1	no	0.0	0	Razaei et al. (2019)
		1	no	0.2	3	Razaei et al. (2019)
		1	no	0.6	309	Razaei et al. (2019)
		1	no	2.2	95	Razaei et al. (2019)
		1	no	3.4	705	Razaei et al. (2019)
		1	no	0.4	51	Razaei et al. (2019)
		1	no	1.0	127	Razaei et al. (2019)
		1	no	0.1	53	Razaei et al. (2019)
		1	no	0.3	147	Razaei et al. (2019)
		1	no	0.0	0	Razaei et al. (2019)
		1	no	0.0	0	Razaei et al. (2019)
		1	no	0.0	0	Razaei et al. (2019)
		1	no	0.0	0	Razaei et al. (2019)
		1	no	0.0	0	Razaei et al. (2019)
		1	no	0.0	0	Razaei et al. (2019)
		1	no		999	van den Berg et al. (2020)
		1	no		1998	van den Berg et al. (2020)
		1	no		999	van den Berg et al. (2020)
		1	no		3996	van den Berg et al. (2020)
		1	no		999	van den Berg et al. (2020)
		1	no		3663	van den Berg et al. (2020)
		1	no		1998	van den Berg et al. (2020)
		1	no		3330	van den Berg et al. (2020)
		1	no		1332	van den Berg et al. (2020)
		1	no		6327	van den Berg et al. (2020)
		1	no		1998	van den Berg et al. (2020)
		1	no		3996	van den Berg et al. (2020)
		1	no		7326	van den Berg et al. (2020)
		1	no		7992	van den Berg et al. (2020)
		1	no		1998	van den Berg et al. (2020)
		1	no		5328	van den Berg et al. (2020)
		1	no		2331	van den Berg et al. (2020)
		1	no		5994	van den Berg et al. (2020)
		1	no		1998	van den Berg et al. (2020)
		1	no		8658	van den Berg et al. (2020)
		1	no		1665	van den Berg et al. (2020)
		1	no		5994	van den Berg et al. (2020)
		1	no		333	van den Berg et al. (2020)
		1	no		4662	van den Berg et al. (2020)
		1	no		333	van den Berg et al. (2020)
		1	no		2331	van den Berg et al. (2020)
		1	no		0	van den Berg et al. (2020)
		1	no		1332	van den Berg et al. (2020)
		1	no		0	van den Berg et al. (2020)
		1	no		1332	van den Berg et al. (2020)
		1	no		999	van den Berg et al. (2020)
		1	no		2664	van den Berg et al. (2020)
		1	no	0.0	0	Zhang et al. (2018)
		1	no	0.8	216	Zhang et al. (2018)
		1	no	0.0	0	Zhang et al. (2018)
		1	no	1.2	409	Zhang et al. (2018)
		1	no	0.0	0	Zhang et al. (2018)
		1	no	0.2	300	Zhang et al. (2018)
		1	no	0.0	0	Zhang et al. (2020)
		1	no	0.0	0	Zhang et al. (2020)
		1	no	0.0	0	Zhang et al. (2020)
		1	no	0.0	205	Zhang et al. (2020)
		2	no		1190	Zubris and Richards (2005)
		2	no		1310	Zubris and Richards (2005)
		2	no		2060	Zubris and Richards (2005)
		2	no		2060	Zubris and Richards (2005)
		2	no		370	Zubris and Richards (2005)
		2	no		510	Zubris and Richards (2005)
		2	no		1030	Zubris and Richards (2005)
		2	no		1410	Zubris and Richards (2005)
		2	pre		88	Crossman et al. (2020)
		2	pre		286	Crossman et al. (2020)
		2	pre		14	Crossman et al. (2020)
		2	pre		22	Crossman et al. (2020)
		2	pre		236	Crossman et al. (2020)
		2	pre		846	Crossman et al. (2020)
		2	pre			Crossman et al. (2020)
		2	pre			Crossman et al. (2020)
		2	pre	0	0	Vollertsen (2017)
		2	pre	16.5	165000	Vollertsen (2017)
		2	pre	0.1	53000	Vollertsen (2017)
		2	pre	224.3	528000	Vollertsen (2017)
		2	pre		13470	Zhang and Liu (2018)
		2	pre		42960	Zhang and Liu (2018)
		2	pre		7100	Zhang and Liu (2018)
		2	pre		26630	Zhang and Liu (2018)
		2	pre		8189	Zhang and Liu (2018)
		2	pre		18100	Zhang and Liu (2018)
		2	pre		43000	Zhou et al. (2019)
		2	pre		620000	Zhou et al. (2019)
		2	pre		96000	Zhou et al. (2019)
		2	pre		690000	Zhou et al. (2019)
		2	pre		22000	Zhou et al. (2019)
		2	pre		200000	Zhou et al. (2019)
		3	post		2650	Ding et al. (2020)
		3	post		3450	Ding et al. (2020)
		3	post		1200	Ding et al. (2020)
		3	post		2550	Ding et al. (2020)
		3	post		750	Ding et al. (2020)
		3	post		2450	Ding et al. (2020)
		3	post		1650	Ding et al. (2020)
		3	post		1950	Ding et al. (2020)
		3	post		1900	Ding et al. (2020)
		3	post		2600	Ding et al. (2020)
		3	post		1167	Ding et al. (2020)
		3	post		1333	Ding et al. (2020)
		3	post		2870	Ding et al. (2020)
		3	post		3930	Ding et al. (2020)
		3	post		2125	Ding et al. (2020)
		3	post		2375	Ding et al. (2020)
		3	post		1525	Ding et al. (2020)
		3	post		1875	Ding et al. (2020)
		3	post		31	Huang et al. (2020)
		3	post		129	Huang et al. (2020)
		3	post		170	Huang et al. (2020)
		3	post		446	Huang et al. (2020)
		3	post		729	Huang et al. (2020)
		3	post		1423	Huang et al. (2020)
		3	post		57	Liu et al. (2018)
		3	post		83	Liu et al. (2018)
		3	post		6	Lv et al. (2019)
		3	post		10	Lv et al. (2019)
		3	post		5	Lv et al. (2019)
		3	post		15	Lv et al. (2019)
		3	post		12	Lv et al. (2019)
		3	post		24	Lv et al. (2019)
		3	post		1	Lv et al. (2019)
		3	post		3	Lv et al. (2019)
		3	post		0	Lv et al. (2019)
		3	post		6	Lv et al. (2019)
		3	post		5	Lv et al. (2019)
		3	post		9	Lv et al. (2019)
		3	post		0	Zhou et al. (2020)
		3	post		2760	Zhou et al. (2020)
			quantiles
		1	no = without pre- or post-treatment	0.4	999	Median
		1		0.0	137	25% quantile
		1		1.8	2415	75% quantile
		2	pre = with pre-treatment	3	20050	Median
		2		0	892	25% quantile
		2		12	597000	75% quantile
		3	post = with post-treatment	-	729	Median
		3		-	12	25% quantile
		3		-	1900	75% quantile

## Sheet: MP concentration ~ world region
		Regional concentrations of microplastic
		No	world region	mg kg-1 ds	items kg-1 ds	reference
		averages
		1	East Asia		625	Chen et al. (2020)
		1	East Asia		4375	Chen et al. (2020)
		1	East Asia		1083	Chen et al. (2020)
		1	East Asia		12500	Chen et al. (2020)
		1	East Asia		1300	Chen et al. (2020)
		1	East Asia		1200	Chen et al. (2020)
		1	East Asia		1875	Chen et al. (2020)
		1	East Asia		300	Chen et al. (2020)
		1	East Asia		400	Chen et al. (2020)
		1	East Asia		4500	Chen et al. (2020)
		1	East Asia		500	Chen et al. (2020)
		1	East Asia		550	Chen et al. (2020)
		1	East Asia		1083	Chen et al. (2020)
		1	East Asia		3167	Chen et al. (2020)
		1	East Asia		750	Chen et al. (2020)
		1	East Asia		1200	Chen et al. (2020)
		1	East Asia		1000	Chen et al. (2020)
		1	East Asia		2100	Chen et al. (2020)
		1	East Asia		1083	Chen et al. (2020)
		1	East Asia		600	Chen et al. (2020)
		1	East Asia		3050	Ding et al. (2020)
		1	East Asia		1875	Ding et al. (2020)
		1	East Asia		1600	Ding et al. (2020)
		1	East Asia		1800	Ding et al. (2020)
		1	East Asia		2250	Ding et al. (2020)
		1	East Asia		1250	Ding et al. (2020)
		1	East Asia		3400	Ding et al. (2020)
		1	East Asia		2250	Ding et al. (2020)
		1	East Asia		1700	Ding et al. (2020)
		1	East Asia		95	Han et al. (2019)
		1	East Asia		80	Huang et al. (2020)
		1	East Asia		308	Huang et al. (2020)
		1	East Asia		1076	Huang et al. (2020)
		1	East Asia		70	Liu et al. (2018)
		1	East Asia		8	Lv et al. (2019)
		1	East Asia		10	Lv et al. (2019)
		1	East Asia		18	Lv et al. (2019)
		1	East Asia		2	Lv et al. (2019)
		1	East Asia		3	Lv et al. (2019)
		1	East Asia		7	Lv et al. (2019)
		1	East Asia		26070	Zhang and Liu (2018)
		1	East Asia		12050	Zhang and Liu (2018)
		1	East Asia		14440	Zhang and Liu (2018)
		1	East Asia	0.3	80	Zhang et al. (2018)
		1	East Asia	0.5	187	Zhang et al. (2018)
		1	East Asia	0.1	87	Zhang et al. (2018)
		1	East Asia	0.1	163	Zhang et al. (2020)
		1	East Asia	0.0	75	Zhang et al. (2020)
		1	East Asia		310	Zhou et al. (2020)
		2	Europe	915.0		Dierkes et al. (2019)
		2	Europe	0.3		Ljung et al. (2018)
		2	Europe	3.4		Ljung et al. (2018)
		2	Europe	0.3		Ljung et al. (2018)
		2	Europe		7220000	Meixner et al. (2019)
		2	Europe		19000000	Meixner et al. (2019)
		2	Europe		8100000	Meixner et al. (2019)
		2	Europe		1990000	Meixner et al. (2019)
		2	Europe		13800000	Meixner et al. (2019)
		2	Europe		11700000	Meixner et al. (2019)
		2	Europe		5180000	Meixner et al. (2019)
		2	Europe		11100000	Meixner et al. (2019)
		2	Europe		3550000	Meixner et al. (2019)
		2	Europe		14100000	Meixner et al. (2019)
		2	Europe		25600000	Meixner et al. (2019)
		2	Europe		0	Piehl et al. (2018)
		2	Europe		1499	van den Berg et al. (2020)
		2	Europe		2664	van den Berg et al. (2020)
		2	Europe		1998	van den Berg et al. (2020)
		2	Europe		2830	van den Berg et al. (2020)
		2	Europe		5328	van den Berg et al. (2020)
		2	Europe		3330	van den Berg et al. (2020)
		2	Europe		7659	van den Berg et al. (2020)
		2	Europe		3330	van den Berg et al. (2020)
		2	Europe		2997	van den Berg et al. (2020)
		2	Europe		3996	van den Berg et al. (2020)
		2	Europe		2831	van den Berg et al. (2020)
		2	Europe		2498	van den Berg et al. (2020)
		2	Europe		999	van den Berg et al. (2020)
		2	Europe		500	van den Berg et al. (2020)
		2	Europe		999	van den Berg et al. (2020)
		2	Europe		2664	van den Berg et al. (2020)
		2	Europe	5.8	71000	Vollertsen (2017)
		2	Europe	12	145000	Vollertsen (2017)
		3	the Americas	1.4	1200	Corradini et al. (2019)
		3	the Americas	2.0	1800	Corradini et al. (2019)
		3	the Americas	2.2	1200	Corradini et al. (2019)
		3	the Americas	2.9	2200	Corradini et al. (2019)
		3	the Americas	4.4	3600	Corradini et al. (2019)
		3	the Americas		187	Crossman et al. (2020)
		3	the Americas		18	Crossman et al. (2020)
		3	the Americas		541	Crossman et al. (2020)
		3	the Americas		4	Crossman et al. (2020)
		3	the Americas		870	Huerta Lwanga et al. (2017)
		3	the Americas		1250	Zubris and Richards (2005)
		3	the Americas		2060	Zubris and Richards (2005)
		3	the Americas		440	Zubris and Richards (2005)
		3	the Americas		1220	Zubris and Richards (2005)
		4	Middle East	1.3	200	Razaei et al. (2019)
		4	Middle East	1.5	267	Razaei et al. (2019)
		4	Middle East	0.0	0	Razaei et al. (2019)
		4	Middle East	0.4	156	Razaei et al. (2019)
		4	Middle East	2.8	400	Razaei et al. (2019)
		4	Middle East	0.7	89	Razaei et al. (2019)
		4	Middle East	0.2	100	Razaei et al. (2019)
		4	Middle East	0.0	0	Razaei et al. (2019)
		4	Middle East	0.0	0	Razaei et al. (2019)
		4	Middle East	0.0	0	Razaei et al. (2019)
		5	Australia	2400.0		Fuller and Gautam (2016)
		extrema
		1	East Asia		2650	Ding et al. (2020)
		1	East Asia		3450	Ding et al. (2020)
		1	East Asia		1200	Ding et al. (2020)
		1	East Asia		2550	Ding et al. (2020)
		1	East Asia		750	Ding et al. (2020)
		1	East Asia		2450	Ding et al. (2020)
		1	East Asia		1650	Ding et al. (2020)
		1	East Asia		1950	Ding et al. (2020)
		1	East Asia		1900	Ding et al. (2020)
		1	East Asia		2600	Ding et al. (2020)
		1	East Asia		1167	Ding et al. (2020)
		1	East Asia		1333	Ding et al. (2020)
		1	East Asia		2870	Ding et al. (2020)
		1	East Asia		3930	Ding et al. (2020)
		1	East Asia		2125	Ding et al. (2020)
		1	East Asia		2375	Ding et al. (2020)
		1	East Asia		1525	Ding et al. (2020)
		1	East Asia		1875	Ding et al. (2020)
		1	East Asia		31	Huang et al. (2020)
		1	East Asia		129	Huang et al. (2020)
		1	East Asia		170	Huang et al. (2020)
		1	East Asia		446	Huang et al. (2020)
		1	East Asia		729	Huang et al. (2020)
		1	East Asia		1423	Huang et al. (2020)
		1	East Asia		57	Liu et al. (2018)
		1	East Asia		83	Liu et al. (2018)
		1	East Asia		6	Lv et al. (2019)
		1	East Asia		10	Lv et al. (2019)
		1	East Asia		5	Lv et al. (2019)
		1	East Asia		15	Lv et al. (2019)
		1	East Asia		12	Lv et al. (2019)
		1	East Asia		24	Lv et al. (2019)
		1	East Asia		1	Lv et al. (2019)
		1	East Asia		3	Lv et al. (2019)
		1	East Asia		0	Lv et al. (2019)
		1	East Asia		6	Lv et al. (2019)
		1	East Asia		5	Lv et al. (2019)
		1	East Asia		9	Lv et al. (2019)
		1	East Asia		13470	Zhang and Liu (2018)
		1	East Asia		42960	Zhang and Liu (2018)
		1	East Asia		7100	Zhang and Liu (2018)
		1	East Asia		26630	Zhang and Liu (2018)
		1	East Asia		8189	Zhang and Liu (2018)
		1	East Asia		18100	Zhang and Liu (2018)
		1	East Asia	0.0	0	Zhang et al. (2018)
		1	East Asia	0.8	216	Zhang et al. (2018)
		1	East Asia	0.0	0	Zhang et al. (2018)
		1	East Asia	1.2	409	Zhang et al. (2018)
		1	East Asia	0.0	0	Zhang et al. (2018)
		1	East Asia	0.2	300	Zhang et al. (2018)
		1	East Asia	0.0	0	Zhang et al. (2020)
		1	East Asia	0.7	413	Zhang et al. (2020)
		1	East Asia	0.0	0	Zhang et al. (2020)
		1	East Asia	0.0	205	Zhang et al. (2020)
		1	East Asia		43000	Zhou et al. (2019)
		1	East Asia		620000	Zhou et al. (2019)
		1	East Asia		96000	Zhou et al. (2019)
		1	East Asia		690000	Zhou et al. (2019)
		1	East Asia		22000	Zhou et al. (2019)
		1	East Asia		200000	Zhou et al. (2019)
		1	East Asia		0	Zhou et al. (2020)
		1	East Asia		2760	Zhou et al. (2020)
		2	Europe	852.4		Dierkes et al. (2019)
		2	Europe	977.6		Dierkes et al. (2019)
		2	Europe		0	Piehl et al. (2018)
		2	Europe		1	Piehl et al. (2018)
		2	Europe		999	van den Berg et al. (2020)
		2	Europe		1998	van den Berg et al. (2020)
		2	Europe		999	van den Berg et al. (2020)
		2	Europe		3996	van den Berg et al. (2020)
		2	Europe		999	van den Berg et al. (2020)
		2	Europe		3663	van den Berg et al. (2020)
		2	Europe		1998	van den Berg et al. (2020)
		2	Europe		3330	van den Berg et al. (2020)
		2	Europe		1332	van den Berg et al. (2020)
		2	Europe		6327	van den Berg et al. (2020)
		2	Europe		1998	van den Berg et al. (2020)
		2	Europe		3996	van den Berg et al. (2020)
		2	Europe		7326	van den Berg et al. (2020)
		2	Europe		7992	van den Berg et al. (2020)
		2	Europe		1998	van den Berg et al. (2020)
		2	Europe		5328	van den Berg et al. (2020)
		2	Europe		2331	van den Berg et al. (2020)
		2	Europe		5994	van den Berg et al. (2020)
		2	Europe		1998	van den Berg et al. (2020)
		2	Europe		8658	van den Berg et al. (2020)
		2	Europe		1665	van den Berg et al. (2020)
		2	Europe		5994	van den Berg et al. (2020)
		2	Europe		333	van den Berg et al. (2020)
		2	Europe		4662	van den Berg et al. (2020)
		2	Europe		333	van den Berg et al. (2020)
		2	Europe		2331	van den Berg et al. (2020)
		2	Europe		0	van den Berg et al. (2020)
		2	Europe		1332	van den Berg et al. (2020)
		2	Europe		0	van den Berg et al. (2020)
		2	Europe		1332	van den Berg et al. (2020)
		2	Europe		999	van den Berg et al. (2020)
		2	Europe		2664	van den Berg et al. (2020)
		2	Europe	0	0	Vollertsen (2017)
		2	Europe	16.5	165000	Vollertsen (2017)
		2	Europe	0.1	53000	Vollertsen (2017)
		2	Europe	224.3	528000	Vollertsen (2017)
		3	the Americas	0.7	0	Corradini et al. (2019)
		3	the Americas	2.2	2200	Corradini et al. (2019)
		3	the Americas	1.8	1200	Corradini et al. (2019)
		3	the Americas	3.2	3200	Corradini et al. (2019)
		3	the Americas	0.6	200	Corradini et al. (2019)
		3	the Americas	4.6	4400	Corradini et al. (2019)
		3	the Americas	1.8	800	Corradini et al. (2019)
		3	the Americas	12.9	12400	Corradini et al. (2019)
		3	the Americas	1.8	1000	Corradini et al. (2019)
		3	the Americas	10.3	10200	Corradini et al. (2019)
		3	the Americas		88	Crossman et al. (2020)
		3	the Americas		286	Crossman et al. (2020)
		3	the Americas		14	Crossman et al. (2020)
		3	the Americas		22	Crossman et al. (2020)
		3	the Americas		236	Crossman et al. (2020)
		3	the Americas		846	Crossman et al. (2020)
		3	the Americas			Crossman et al. (2020)
		3	the Americas			Crossman et al. (2020)
		3	the Americas		0	Huerta Lwanga et al. (2017)
		3	the Americas		2770	Huerta Lwanga et al. (2017)
		3	the Americas		1190	Zubris and Richards (2005)
		3	the Americas		1310	Zubris and Richards (2005)
		3	the Americas		2060	Zubris and Richards (2005)
		3	the Americas		2060	Zubris and Richards (2005)
		3	the Americas		370	Zubris and Richards (2005)
		3	the Americas		510	Zubris and Richards (2005)
		3	the Americas		1030	Zubris and Richards (2005)
		3	the Americas		1410	Zubris and Richards (2005)
		4	Middle East	0.1	0	Razaei et al. (2019)
		4	Middle East	2.5	431	Razaei et al. (2019)
		4	Middle East	0.6	27	Razaei et al. (2019)
		4	Middle East	2.4	507	Razaei et al. (2019)
		4	Middle East	0.0	0	Razaei et al. (2019)
		4	Middle East	0.0	0	Razaei et al. (2019)
		4	Middle East	0.2	3	Razaei et al. (2019)
		4	Middle East	0.6	309	Razaei et al. (2019)
		4	Middle East	2.2	95	Razaei et al. (2019)
		4	Middle East	3.4	705	Razaei et al. (2019)
		4	Middle East	0.4	51	Razaei et al. (2019)
		4	Middle East	1.0	127	Razaei et al. (2019)
		4	Middle East	0.1	53	Razaei et al. (2019)
		4	Middle East	0.3	147	Razaei et al. (2019)
		4	Middle East	0.0	0	Razaei et al. (2019)
		4	Middle East	0.0	0	Razaei et al. (2019)
		4	Middle East	0.0	0	Razaei et al. (2019)
		4	Middle East	0.0	0	Razaei et al. (2019)
		4	Middle East	0.0	0	Razaei et al. (2019)
		4	Middle East	0.0	0	Razaei et al. (2019)
		5	Australia	300.0		Fuller and Gautam (2016)
		5	Australia	67500.0		Fuller and Gautam (2016)
		quantiles
		1	East Asia	0.1	1076	Median
		1		0.0	78	30% quantile
		1		0.4	2500	70% quantile
		2	Europe	8.9	2914	Median
		2		0.3	1332	30% quantile
		2		381.3	8159	70% quantile
		3	the Americas	2.2	1110	Median
		3		1.8	274	30% quantile
		3		3.8	2060	70% quantile
		4	Middle East	0.2	39	Median
		4		0.0	0	30% quantile
		4		0.9	154	70% quantile
		5	Australia	2400.0	-	Median
		5		1350.0	-	30% quantile
		5		34950.0	-	70% quantile

## Sheet: Studies per year
		year counter	terrestrial													Number of studies on ...
		before 2000	0
		2000	0														pm	sew	road	lit	pond	mult	NA	none	Sum
		2001	0													items	93	24	12	10	6	37	35	1	218
		2002	0													mg	10	8	1	0	0	0	10	0	29
		2003	0
		2004	0														agr	hort	gra	fal	for	NA			Sum
		2005	1													items	118	65	5	7	8	15			218
		2006	0													mg	20	2	5	0	0	2			29
		2007	0
		2008	0														mun	rur	ind	NA					Sum
		2009	0													items	147	39	13	19					218
		2010	0													mg	11	15	1	2					29
		2011	0
		2012	0														no	pre	post						Sum
		2013	0													items	72	46	99						217
		2014	0													mg	22	5	0						27
		2015	0
		2016	1
		2017	2
		2018	5
		2019	6
		2020	8
		Sum	23
